# Supplementary material for: Arbuzov meets 1,2-oxaphosphetanes: transient 1,2-oxaphosphetan-2-iums as an entry point to beta-halo phosphane oxides and P-containing oligomers
Source: Royal Society of Chemistry journal article supplement (doi:10.1039/d4cc00254g), 2024-01-01
Supplement: d4cc00254g1.pdf [file d4cc00254g1.pdf]

## Supporting Information

### **Arbuzov meets 1,2-oxaphosphetanes: transient 1,2-oxaphosphetan-2-iums as entry point to beta-halo phosphane oxides and P-containing oligomers**

F. Gleim, G. Schnakenburg, A. Espinosa Ferao\* and R. Streubel\*

## Content

|                                                                                                                                                                                                                                                       |     |
|-------------------------------------------------------------------------------------------------------------------------------------------------------------------------------------------------------------------------------------------------------|-----|
| <b>General procedures.</b> Synthetic methods and analytical data for <b>4</b> , <b>5</b> , <b>6</b> , <b>7</b> , <b>10a-d</b> and <b>11</b> .....                                                                                                     | S3  |
| <b>Figure S1.</b> $^1\text{H}$ NMR spectrum of <b>4</b> .....                                                                                                                                                                                         | S4  |
| <b>Figure S2.</b> $^1\text{H}\{^{31}\text{P}\}$ NMR spectrum of <b>4</b> .....                                                                                                                                                                        | S4  |
| <b>Figure S3.</b> $^{13}\text{C}\{^1\text{H}\}$ NMR spectrum of <b>4</b> .....                                                                                                                                                                        | S5  |
| <b>Figure S4.</b> $^{31}\text{P}\{^1\text{H}\}$ NMR spectrum of <b>4</b> .....                                                                                                                                                                        | S5  |
| <b>Figure S5.</b> $^1\text{H}$ NMR spectrum of <b>5</b> .....                                                                                                                                                                                         | S6  |
| <b>Figure S6.</b> $^{13}\text{C}\{^1\text{H}\}$ NMR spectrum of <b>5</b> .....                                                                                                                                                                        | S7  |
| <b>Figure S7.</b> $^{31}\text{P}\{^1\text{H}\}$ NMR spectrum of <b>5</b> .....                                                                                                                                                                        | S7  |
| <b>Figure S8.</b> $^{31}\text{P}$ NMR spectrum of <b>5</b> .....                                                                                                                                                                                      | S8  |
| <b>Figure S9.</b> $^1\text{H}$ NMR spectrum of <b>6</b> .....                                                                                                                                                                                         | S9  |
| <b>Figure S10.</b> $^{13}\text{C}\{^1\text{H}\}$ NMR spectrum of <b>6</b> .....                                                                                                                                                                       | S9  |
| <b>Figure S11.</b> $^{31}\text{P}\{^1\text{H}\}$ NMR spectrum of <b>6</b> .....                                                                                                                                                                       | S10 |
| <b>Figure S12.</b> $^{31}\text{P}$ NMR spectrum of <b>6</b> .....                                                                                                                                                                                     | S10 |
| <b>Figure S13.</b> $^{31}\text{P}\{^1\text{H}\}$ NMR spectrum of the reaction solution of <b>7</b> .....                                                                                                                                              | S11 |
| <b>Figure S14.</b> $^1\text{H}$ NMR spectrum of <b>10a</b> .....                                                                                                                                                                                      | S12 |
| <b>Figure S15.</b> $^1\text{H}\{^{31}\text{P}\}$ NMR spectrum of <b>10a</b> .....                                                                                                                                                                     | S13 |
| <b>Figure S16.</b> $^{13}\text{C}\{^1\text{H}\}$ NMR spectrum of <b>10a</b> .....                                                                                                                                                                     | S13 |
| <b>Figure S17.</b> $^{31}\text{P}\{^1\text{H}\}$ NMR spectrum of <b>10a</b> .....                                                                                                                                                                     | S14 |
| <b>Figure S18.</b> $^1\text{H}$ NMR spectrum of <b>10b</b> .....                                                                                                                                                                                      | S15 |
| <b>Figure S19.</b> $^1\text{H}\{^{31}\text{P}\}$ NMR spectrum of <b>10b</b> .....                                                                                                                                                                     | S16 |
| <b>Figure S20.</b> $^{13}\text{C}\{^1\text{H}\}$ NMR spectrum of <b>10b</b> .....                                                                                                                                                                     | S16 |
| <b>Figure S21.</b> $^{31}\text{P}\{^1\text{H}\}$ NMR spectrum of <b>10b</b> .....                                                                                                                                                                     | S17 |
| <b>Figure S22.</b> $^1\text{H}$ NMR spectrum of <b>10c</b> .....                                                                                                                                                                                      | S18 |
| <b>Figure S23.</b> $^{13}\text{C}\{^1\text{H}\}$ NMR spectrum of <b>10c</b> .....                                                                                                                                                                     | S18 |
| <b>Figure S24.</b> $^{31}\text{P}\{^1\text{H}\}$ NMR spectrum of <b>10c</b> .....                                                                                                                                                                     | S19 |
| <b>Figure S25.</b> $^1\text{H}$ NMR spectrum of <b>10d</b> .....                                                                                                                                                                                      | S20 |
| <b>Figure S26.</b> $^1\text{H}\{^{31}\text{P}\}$ NMR spectrum of <b>10d</b> .....                                                                                                                                                                     | S20 |
| <b>Figure S27.</b> $^{13}\text{C}\{^1\text{H}\}$ NMR spectrum of <b>10d</b> .....                                                                                                                                                                     | S21 |
| <b>Figure S28.</b> $^{31}\text{P}\{^1\text{H}\}$ NMR spectrum of <b>10d</b> .....                                                                                                                                                                     | S21 |
| <b>Figure S29.</b> $^{31}\text{P}\{^1\text{H}\}$ NMR-VT spectra of the reaction solution of <b>11</b> , $-80^\circ\text{C}$ to $40^\circ\text{C}$ .....                                                                                               | S22 |
| <b>Figure S30.</b> $^{31}\text{P}\{^1\text{H}\}$ NMR spectrum of the reaction solution of <b>11</b> at $-50^\circ\text{C}$ .....                                                                                                                      | S23 |
| <b>Table S1:</b> Absolute intensity of oligomers of <b>11</b> measured with MALDI MS, in a.u. $\cdot 10^4$ .....                                                                                                                                      | S24 |
| <b>Table S2:</b> Relative intensity of oligomers of <b>11</b> measured with MALDI MS, normalized to the base peak and in %.....                                                                                                                       | S24 |
| Crystal structure data of <b>4</b> ( $\text{C}_{26}\text{H}_{19}\text{O}_6\text{PMo}$ ).....                                                                                                                                                          | S25 |
| Crystal structure data of <b>5</b> ( $\text{C}_{28}\text{H}_{23}\text{O}_6\text{PMo}$ ).....                                                                                                                                                          | S26 |
| Crystal structure data of <b>6</b> ( $\text{C}_{21}\text{H}_{19}\text{OP}$ ).....                                                                                                                                                                     | S26 |
| Crystal structure data of <b>10a</b> ( $\text{C}_{24}\text{H}_{24}\text{BrO}_3\text{P}$ ).....                                                                                                                                                        | S27 |
| Crystal structure data of <b>10b</b> ( $\text{C}_{29}\text{H}_{26}\text{BrO}_2\text{P}$ ).....                                                                                                                                                        | S27 |
| Crystal structure data of <b>10c</b> ( $\text{C}_{24}\text{H}_{24}\text{BrO}_2\text{P}$ ).....                                                                                                                                                        | S28 |
| <b>Theoretical Investigations.</b> ....                                                                                                                                                                                                               | S29 |
| <b>Computational Details.</b> ....                                                                                                                                                                                                                    | S29 |
| <b>Figure S31.</b> Computed (CPCM <sub>THF</sub> /PWPB95-D3/def2-QZVPP//CPCM <sub>THF</sub> /PBEh-3c) Gibbs energy profile for the reaction of model <b>6*</b> with <b>8a</b> , showing the competitive Arbuzov (blue) and Perkow (red) pathways..... | S29 |
| <b>Figure S32.</b> Computed (CPCM <sub>THF</sub> /PWPB95-D3/def2-QZVPP//CPCM <sub>THF</sub> /PBEh-3c) frontier molecular orbitals (FMO) for model <b>6*</b> and reagents <b>8d</b> and <b>8a</b> .....                                                | S30 |
| <b>Computed Structures.</b> ....                                                                                                                                                                                                                      | S30 |
| <b>References.</b> ....                                                                                                                                                                                                                               | S37 |

## EXPERIMENTAL PART

### GENERAL EXPERIMENTAL DETAILS

The syntheses of all compounds were performed under an argon atmosphere, using common Schlenk techniques and dry solvents. Tetrahydrofuran, diethyl ether, and *n*-pentane were dried over sodium wire/benzophenone, CH<sub>2</sub>Cl<sub>2</sub> over CaH<sub>2</sub>, and further purified by subsequent distillation. All NMR spectra were recorded on a Bruker AV III HD Prodigy 500 spectrometer at 25°C. The <sup>1</sup>H and <sup>13</sup>C NMR spectra were referenced to the residual proton resonances and the <sup>13</sup>C NMR signals of the deuterated solvents and <sup>31</sup>P to 85% H<sub>3</sub>PO<sub>4</sub> as external standards, respectively. Melting points were determined in one-side melted off capillaries using a Büchi Type S apparatus; the values are uncorrected. Mass spectrometric data were collected on a Bruker Daltonik ultrafleXtreme TOF/TOF mass spectrometer using MALDI or on a Thermo Fisher Scientific Orbitrap XL using ESI(+/-) or APCI.

### SYNTHETIC PROCEDURES, ANALYTICAL DATA, AND NMR SPECTRA

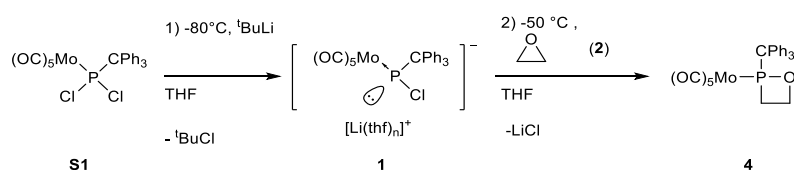

**Synthesis of 4:** 2.433 g (4.19 mmol, 1 eq) of the complex **S1** was dissolved in 60 ml of dried THF and cooled to  $-80^\circ\text{C}$ . 3.14 mL (5.02 mmol, 1.2 eq) of a tert-butyllithium solution (1.6 M in *n*-pentane) was slowly added. The solution was kept stirring while slowly warming up. Upon reaching  $-50^\circ\text{C}$ , 4.0 mL (10 mmol, 2.4 eq) ethylene oxide (**2**) solution (2.5-3.3 M in THF) was added. The solution was further kept stirring while slowly warming up to ambient temperature. After reaching room temperature, all volatiles were removed in vacuo (0.02 mbar). The crude product was purified by filtration with 300 mL of Et<sub>2</sub>O over Al<sub>2</sub>O<sub>3</sub> (h = 10 cm, d = 3 cm, r.t.) and removal of the solvent in vacuo (0.02 mbar). The crude product was further washed with *n*-pentane (four times 10 mL) at  $-60^\circ\text{C}$ . After removal of the solvent in vacuo (0.02 mbar) the product was obtained as a white solid.

Yield: 1.5085 g, 2.72 mmol, 65%. <sup>1</sup>H NMR (500 MHz, CDCl<sub>3</sub>) δ (ppm) = 3.00 (dddd, 1H, <sup>2</sup>J<sub>H-H</sub> = 13.1 Hz, <sup>2</sup>J<sub>P-H</sub> = 10.4 Hz, <sup>3</sup>J<sub>H-H</sub> = 10.3 Hz, <sup>3</sup>J<sub>H-H</sub> = 7.1 Hz, -PCH<sub>2</sub>), 3.09 (dddd, 1H, <sup>2</sup>J<sub>H-H</sub> = 14.1 Hz, <sup>3</sup>J<sub>H-H</sub> = 8.5 Hz, <sup>3</sup>J<sub>H-H</sub> = 5.6 Hz, <sup>2</sup>J<sub>P-H</sub> = 3.8 Hz, -PCH<sub>2</sub>), 4.48 (dddd, 1H, <sup>3</sup>J<sub>H-H</sub> = 10.5 Hz, <sup>2</sup>J<sub>H-H</sub> = 7.0 Hz, <sup>3</sup>J<sub>P-H</sub> = 5.5 Hz, <sup>3</sup>J<sub>H-H</sub> = 5.5 Hz, -OCH<sub>2</sub>), 5.09 (dddd, 1H, <sup>3</sup>J<sub>H-H</sub> = 8.5 Hz, <sup>3</sup>J<sub>H-H</sub> = 7.0 Hz, <sup>2</sup>J<sub>H-H</sub> = 7.0 Hz, <sup>3</sup>J<sub>P-H</sub> = 4.7 Hz, -OCH<sub>2</sub>), 7.37 (m, 15H, -CH). <sup>1</sup>H{<sup>31</sup>P} NMR (500 MHz, CDCl<sub>3</sub>) δ (ppm) = 3.00 (ddd, 1H, <sup>2</sup>J<sub>H-H</sub> = 13.6 Hz, <sup>3</sup>J<sub>H-H</sub> = 10.3 Hz, <sup>3</sup>J<sub>H-H</sub> = 7.0 Hz, -PCH<sub>2</sub>), 3.09 (ddd, 1H, <sup>2</sup>J<sub>H-H</sub> = 14.1 Hz, <sup>3</sup>J<sub>H-H</sub> = 8.5 Hz, <sup>3</sup>J<sub>H-H</sub> = 5.7 Hz, -PCH<sub>2</sub>), 4.48 (dddd, 1H, <sup>3</sup>J<sub>H-H</sub> = 10.3 Hz, <sup>2</sup>J<sub>H-H</sub> = 7.0 Hz, <sup>3</sup>J<sub>H-H</sub> = 5.6 Hz, -OCH<sub>2</sub>), 5.09 (ddd, 1H, <sup>3</sup>J<sub>H-H</sub> = 8.6 Hz, <sup>3</sup>J<sub>H-H</sub> = 7.0 Hz, <sup>2</sup>J<sub>H-H</sub> = 7.0 Hz, -OCH<sub>2</sub>), 7.36 (m, 15H, -CH). <sup>13</sup>C NMR (126 MHz, 298 K, CDCl<sub>3</sub>): δ / ppm = 33.9 (d, 1C, <sup>1</sup>J<sub>P-C</sub> = 22.6 Hz, -PCH<sub>2</sub>), 67.7 (d, 1C, <sup>1</sup>J<sub>P-C</sub> = 9.3 Hz, -CPh<sub>3</sub>), 71.6 (d, 1C, <sup>2</sup>J<sub>P-C</sub> = 13.4 Hz, -OCH<sub>2</sub>), 127.7 (s<sub>br</sub>, 3C, para-CH), 128.7 (s, 6C, meta-CH), 130.6 (s<sub>br</sub>, 6C, ortho-CH), 141.3 (s<sub>br</sub>, 3C, ipso-C), 204.7 (d, 4C, <sup>2</sup>J<sub>P-C</sub> = 9.3 Hz, cis-CO), 210.5 (d, 1C, <sup>2</sup>J<sub>P-C</sub> = 32.4 Hz, trans-CO). <sup>31</sup>P{<sup>1</sup>H} NMR (202 MHz, CDCl<sub>3</sub>) δ (ppm) = 220.6 (s). MS (APCI) m/z (%) : 243.117 (14) [CPh<sub>3</sub>]<sup>+</sup>, 319.124 (26) [M-(Mo(CO)<sub>5</sub>)+H]<sup>+</sup>, 388.999 (100) [Mo-P(CPh<sub>3</sub>)OH]<sup>+</sup>, 557.005 (10) [M+H]<sup>+</sup>. HRMS (APCI): theor./exp. 557.0047/557.0041 [M+H]<sup>+</sup>.

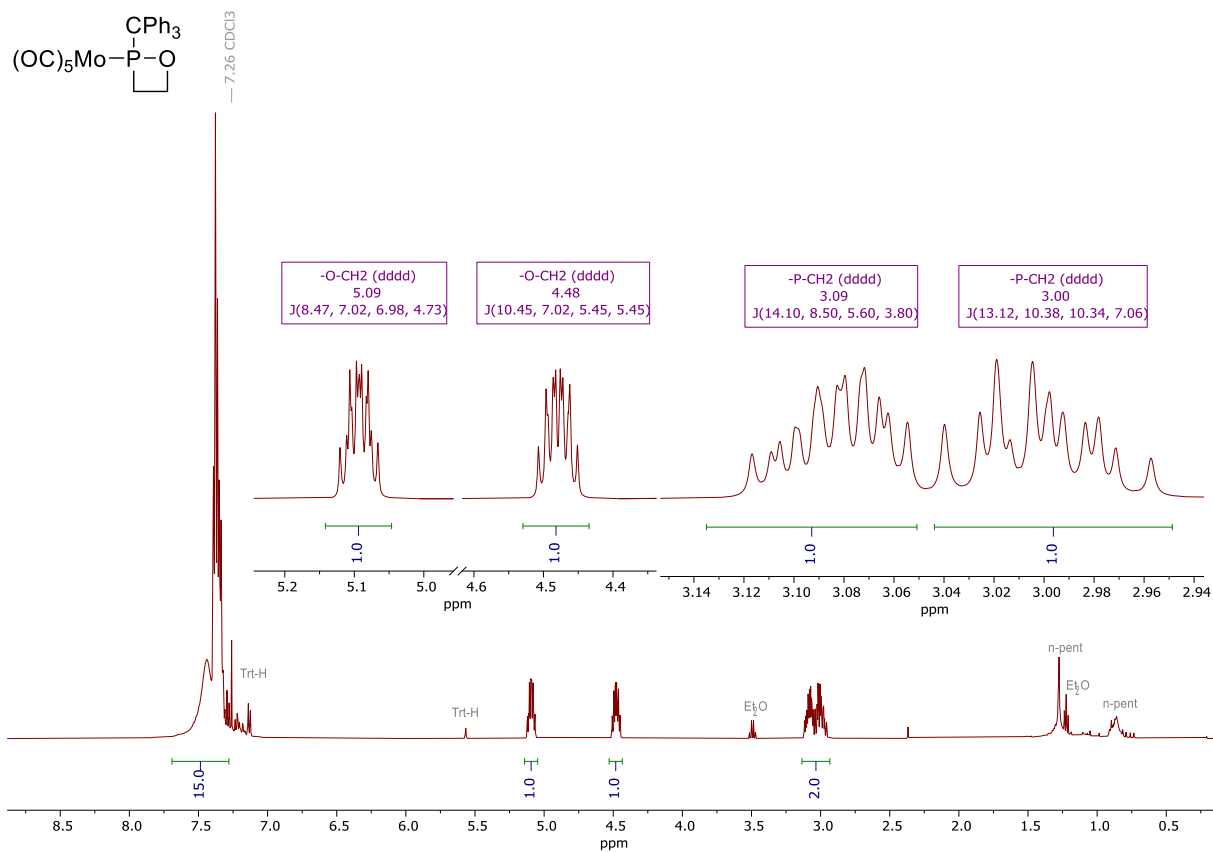

Figure S1:  $^1H$ -NMR spectrum of **4** in  $CDCl_3$ .

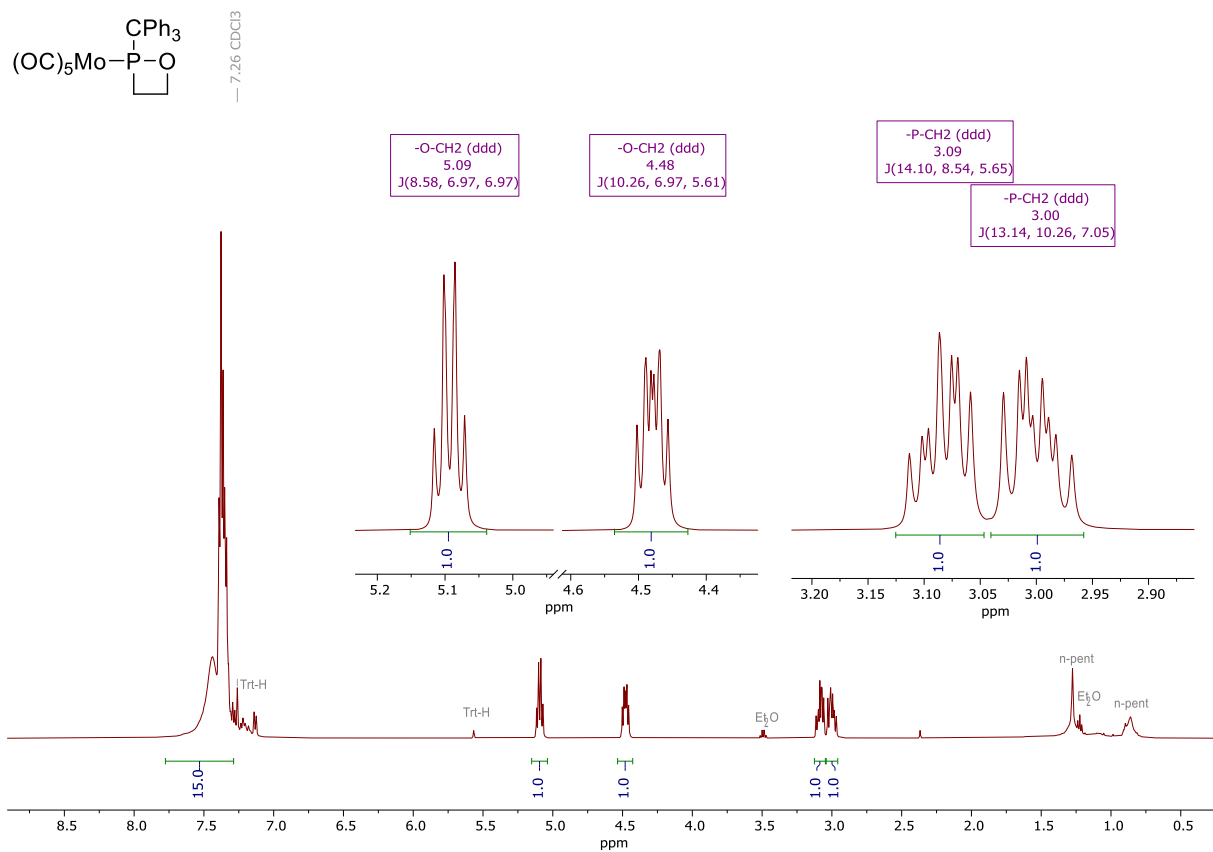

Figure S2:  $^1H\{^{31}P\}$ -NMR spectrum of **4** in  $CDCl_3$ .

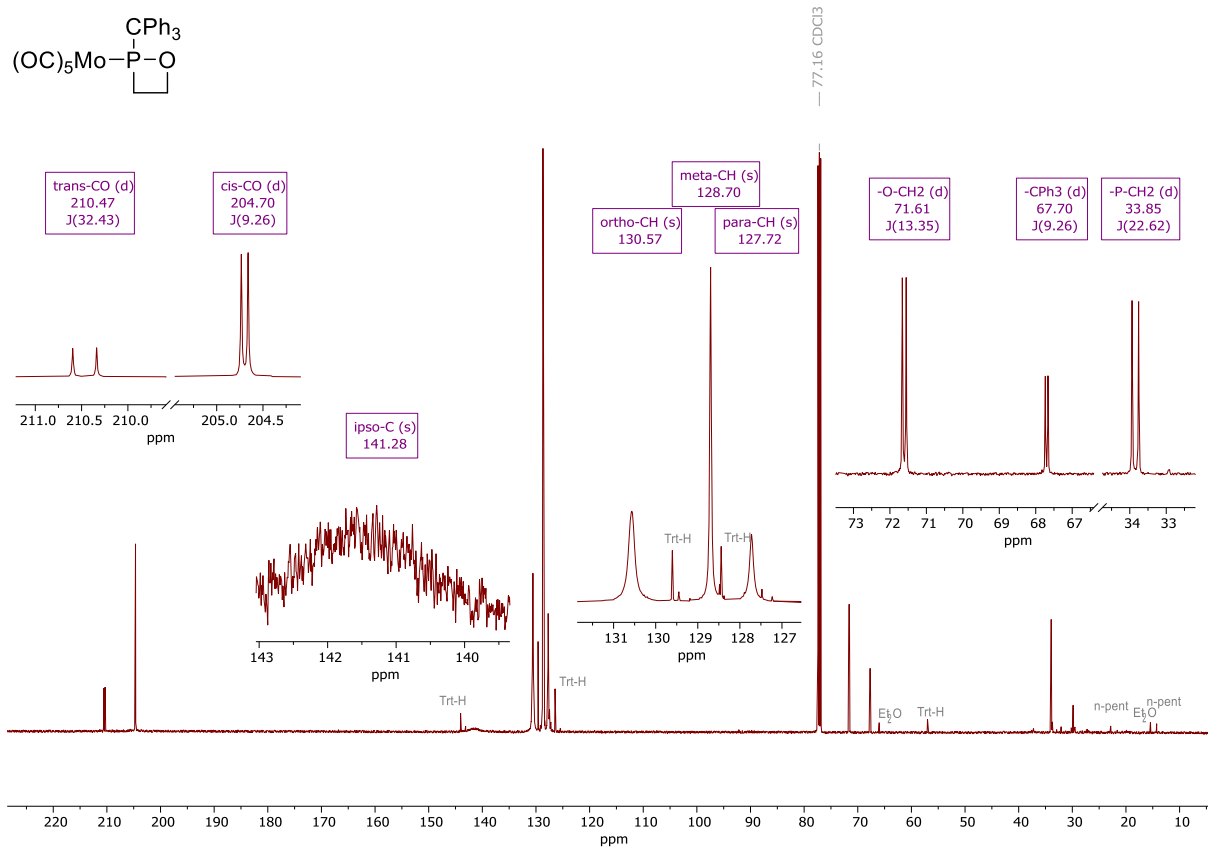

Figure S3:  $^{13}C\{^1H\}$ -NMR spectrum of **4** in  $CDCl_3$ .

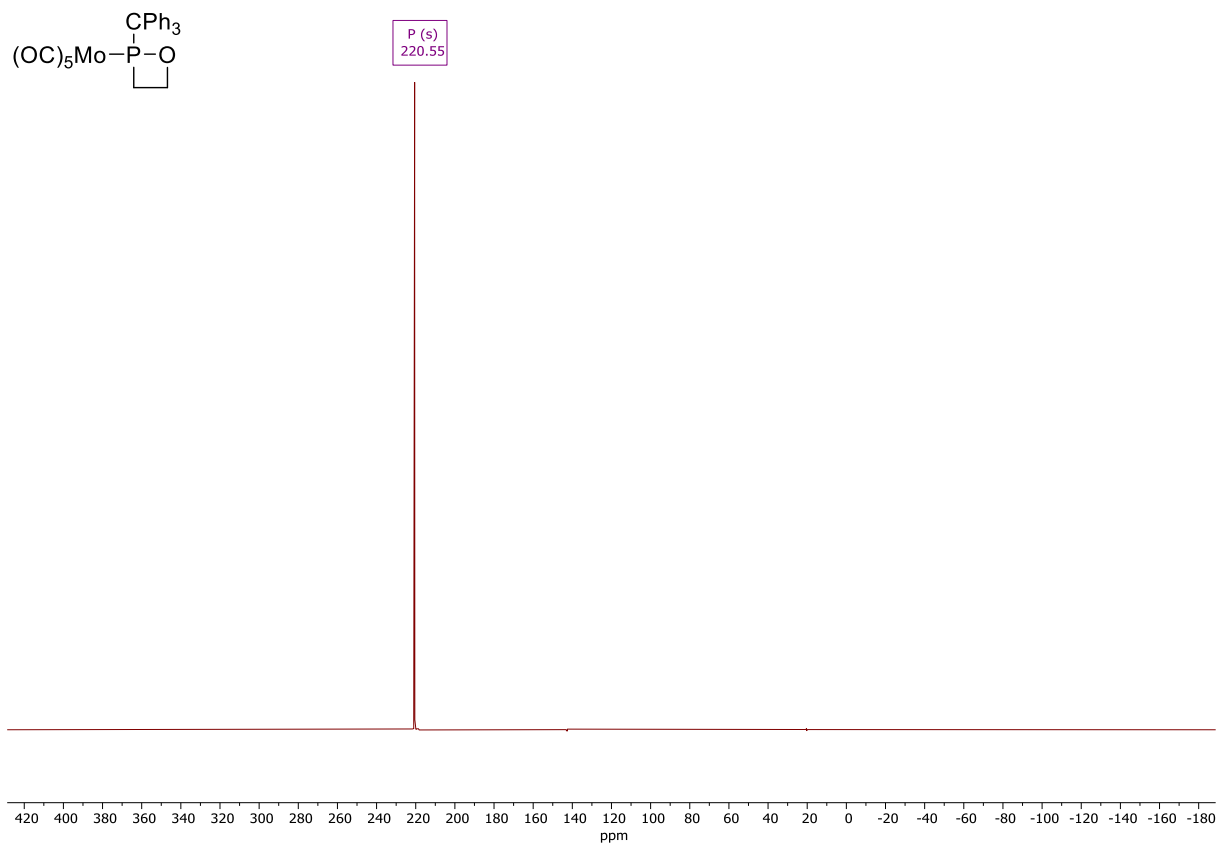

Figure S4:  $^{31}P\{^1H\}$ -NMR spectrum of **4** in  $CDCl_3$ .

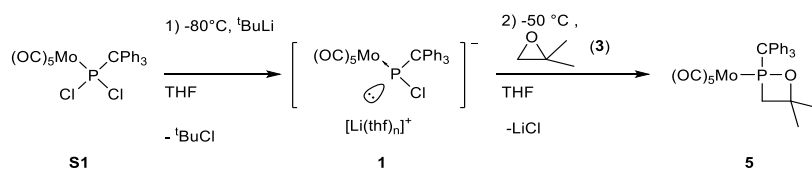

**Synthesis of 5:** 2.96 g (5.09 mmol, 1 eq) of the complex **S1** was dissolved in 60 ml of dried THF and cooled to  $-80^\circ\text{C}$ . 3.82 mL (6.11 mmol, 1.2 eq) of a tert-butyllithium solution (1.6 M in n-pentane) was slowly added. The solution was kept stirring while slowly warming up. Upon reaching  $-50^\circ\text{C}$ , 1.35 mL (15.3 mmol, 3 eq) 2,2-dimethyloxirane (**3**) was added. The solution was further kept stirring while slowly warming up to ambient temperature. After reaching room temperature, all volatiles were removed in vacuo (0.02 mbar). The crude product was purified by filtration with 300 mL of Et<sub>2</sub>O over Al<sub>2</sub>O<sub>3</sub> (h = 10 cm, d = 3 cm, r.t.) and removal of the solvent in vacuo (0.02 mbar). The crude product was further washed with n-pentane (three times 15 mL at  $-80^\circ\text{C}$ , once with 5 mL at  $-30^\circ\text{C}$ ). After removal of the solvent in vacuo (0.02 mbar) the product was obtained as a white solid.

Yield: 2.29 g, 3.9 mmol, 77%. **<sup>1</sup>H NMR** (500 MHz, CDCl<sub>3</sub>) δ (ppm) = 0.79 (s, 3H, -CH<sub>3</sub>), 1.85 (s, 3H, -CH<sub>3</sub>), 3.07 (dd, 1H, <sup>2</sup>J<sub>H-H</sub> = 13.0 Hz, <sup>2</sup>J<sub>P-H</sub> = 4.6 Hz, -CH<sub>2</sub>), 3.30 (dd, 1H, <sup>2</sup>J<sub>H-H</sub> = 13.1 Hz, <sup>2</sup>J<sub>P-H</sub> = 11.7 Hz, -CH<sub>2</sub>), 7.30 (t, 3H, <sup>3</sup>J<sub>H-H</sub> = 7.8 Hz, para-CH), 7.36 (dd, 6H, <sup>3</sup>J<sub>H-H</sub> = 7.6 Hz, <sup>3</sup>J<sub>H-H</sub> = 7.6 Hz, meta-CH), 7.46 (d, 6H, <sup>3</sup>J<sub>H-H</sub> = 7.6 Hz, ortho-CH). **<sup>13</sup>C NMR** (126 MHz, 298 K, CDCl<sub>3</sub>) δ / ppm = 31.5 (s, 1C, -CH<sub>3</sub>), 32.2 (d 1C, <sup>3</sup>J<sub>P-C</sub> = 1.6 Hz, -CH<sub>3</sub>), 44.6 (d, 1C, <sup>1</sup>J<sub>P-C</sub> = 16.6 Hz, -CH<sub>2</sub>), 67.6 (d, 1C, <sup>1</sup>J<sub>P-C</sub> = 10.9 Hz, -CPh<sub>3</sub>), 88.2 (d, 1C, <sup>2</sup>J<sub>P-C</sub> = 10.9 Hz, -CMe<sub>2</sub>), 127.7 (s, 3C, para-CH), 128.4 (s, 6C, meta-CH), 131.8 (d, 6C, <sup>3</sup>J<sub>P-C</sub> = 7.1 Hz, ortho-CH), 140.9 (s<sub>br</sub>, 3C, ipso-C), 204.9 (d, 4C, <sup>2</sup>J<sub>P-C</sub> = 9.3 Hz, cis-CO), 210.3 (d, 1C, <sup>2</sup>J<sub>P-C</sub> = 32.4 Hz, trans-CO). **<sup>31</sup>P{<sup>1</sup>H} NMR** (202 MHz, CDCl<sub>3</sub>) δ (ppm) = 184.5 (s). **<sup>31</sup>P NMR** (202 MHz, CDCl<sub>3</sub>) δ (ppm) = 184.5 (d, <sup>2</sup>J<sub>P-H</sub> = 16.2 Hz). **MS** (APCI) m/z (%): 243.117 (100) [CPh<sub>3</sub>]<sup>+</sup>, 291.092 (35) [HOPCPh<sub>3</sub>]<sup>+</sup>, 347.155 (25) [M-Mo(CO)<sub>5</sub>+H]<sup>+</sup>, 388.997 (5) [MoPh<sub>3</sub>CPO+H]<sup>+</sup>, 444.987 (10) [M-5(CO)+H]<sup>+</sup>, 472.982 (5) [M-4(CO)+H]<sup>+</sup>, 501.049 (5) [M-3(CO)+H]<sup>+</sup>, 529.044 (5) [M-2(CO)+H]<sup>+</sup>. **HRMS** (APCI): theor./exp. 347.1559/347.1555 [M-Mo(CO)<sub>5</sub>+H]<sup>+</sup>, 501.0517/ 501.0517 [M-3(CO)+H]<sup>+</sup>, 529.0467/ 529.0468 [M-2(CO)+H]<sup>+</sup>.

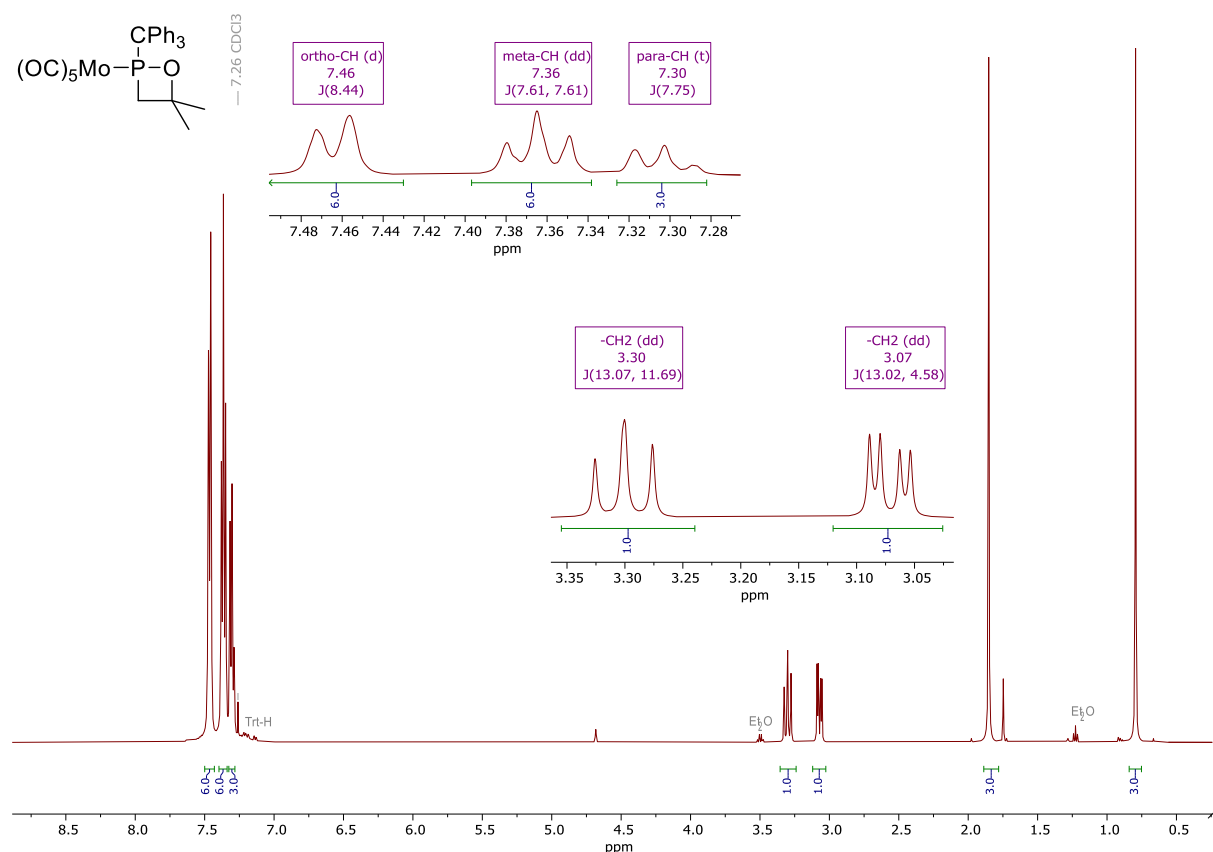

**Figure S5:** <sup>1</sup>H-NMR spectrum of **5** in CDCl<sub>3</sub>.

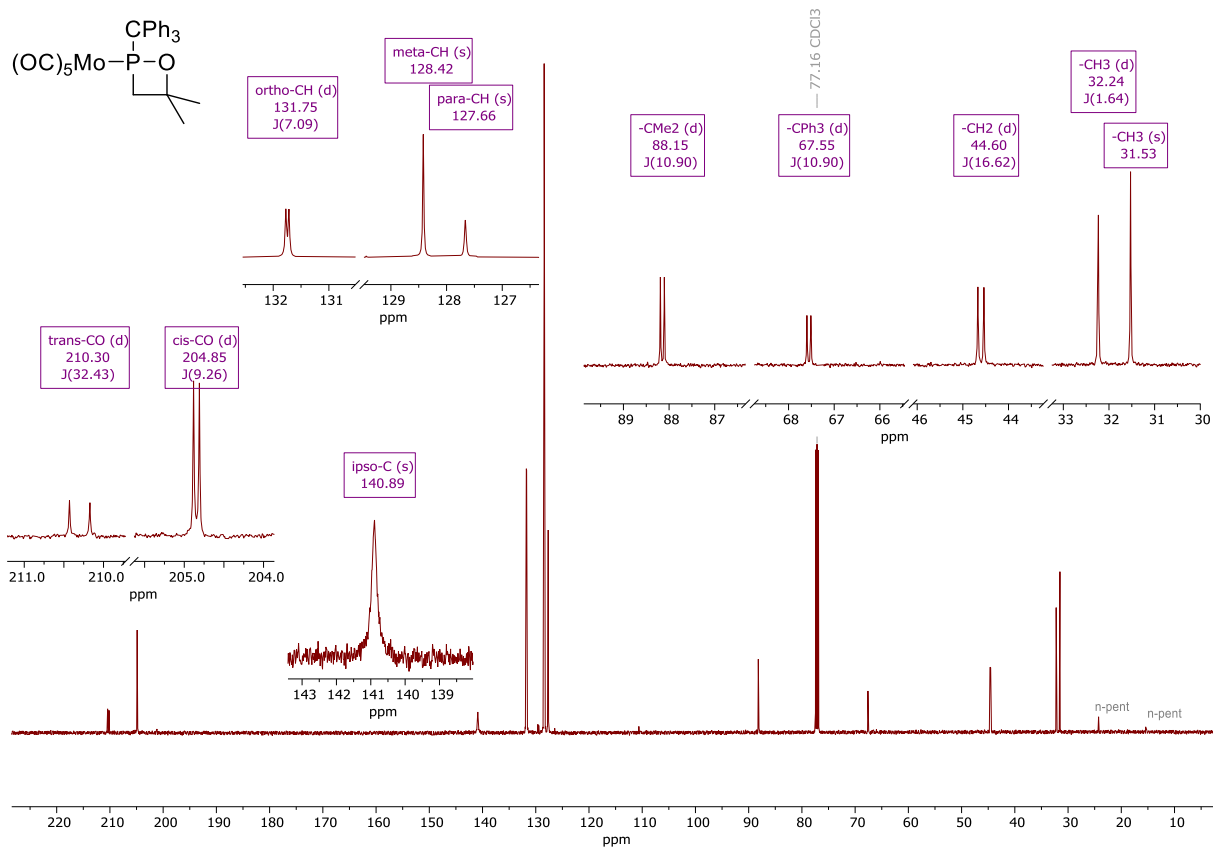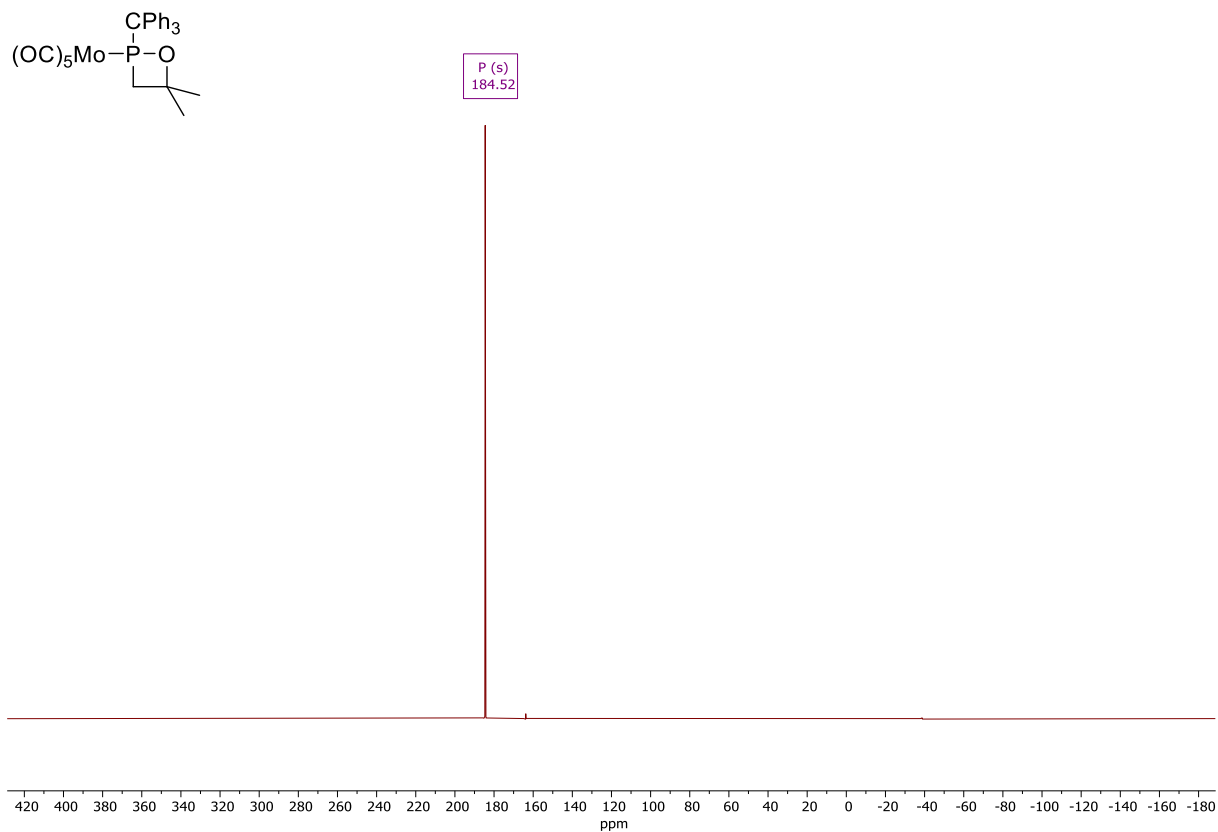

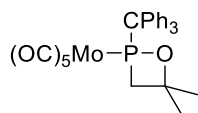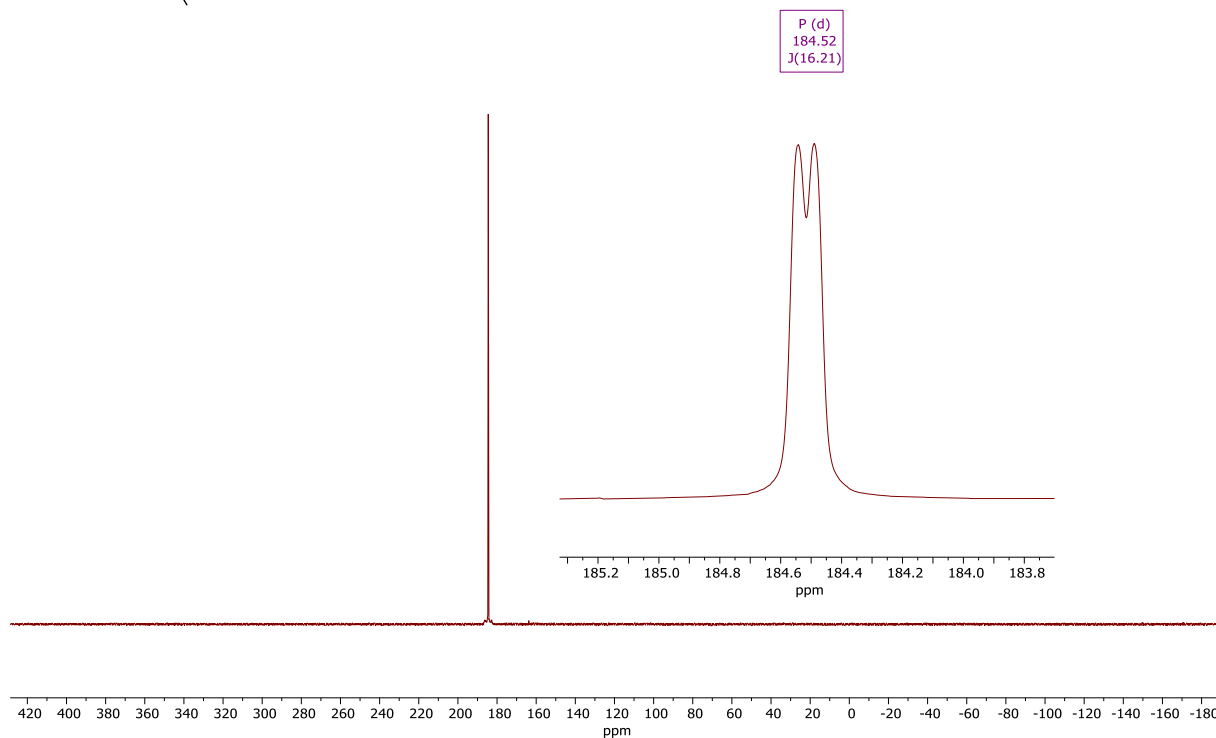

Figure S8:  $^{31}\text{P}$ -NMR spectrum of **5** in  $\text{CDCl}_3$ .

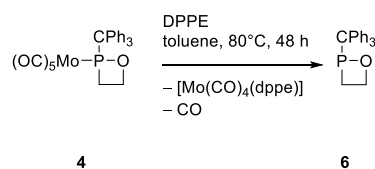

**Synthesis of 6:** 3.2409 g (5.85 mmol, 1 eq) of **4** and 2.2827 g (5.73 mmol, 0.98 eq) 1,2-bis(diphenylphosphino)ethane (DPPE) were dissolved in 60 mL toluene and heated to 80 °C for 48 h. Full conversion was proven by  $^{31}\text{P}$  NMR measurement. The product was obtained after extraction with *n*-pentane (six times 20 mL, ambient temperature) as yellow solid.

Yield: 1.289 g, 4.08 mmol, 70%.  $^1\text{H}$  NMR (500 MHz,  $\text{CDCl}_3$ )  $\delta$  (ppm) = 2.29 (dddd, 1H,  $^2J_{\text{H-H}} = 13.3$  Hz,  $^3J_{\text{H-H}} = 10.3$  Hz,  $^3J_{\text{H-H}} = 6.7$  Hz,  $^2J_{\text{P-H}} = 3.2$  Hz, -PCH<sub>2</sub>), 2.83 (dddd, 1H,  $^2J_{\text{P-H}} = 21.4$  Hz,  $^2J_{\text{H-H}} = 12.8$  Hz,  $^3J_{\text{H-H}} = 8.7$  Hz,  $^3J_{\text{H-H}} = 6.1$  Hz, -PCH<sub>2</sub>), 4.42 (dddd, 1H,  $^3J_{\text{H-H}} = 10.5$  Hz,  $^2J_{\text{H-H}} = 7.1$  Hz,  $^3J_{\text{H-H}} = 5.9$  Hz,  $^3J_{\text{P-H}} = 0.9$  Hz, -OCH<sub>2</sub>), 5.05 (dddd, 1H,  $^3J_{\text{H-H}} = 8.7$  Hz,  $^2J_{\text{H-H}} = 7.0$  Hz,  $^3J_{\text{H-H}} = 6.9$  Hz,  $^3J_{\text{P-H}} = 1.8$  Hz, -OCH<sub>2</sub>), 7.28 (m, 9H, -CH), 7.34 (m, 6H, -CH).  $^{13}\text{C}$  NMR (126 MHz,  $\text{CDCl}_3$ )  $\delta$  (ppm) = 24.1 (d, 1C,  $^1J_{\text{P-C}} = 24.1$  Hz, -PCH<sub>2</sub>), 63.4 (d, 1C,  $^1J_{\text{P-C}} = 50.1$  Hz, -CPh<sub>3</sub>), 74.0 (d, 1C,  $^2J_{\text{P-C}} = 3.3$  Hz, -OCH), 126.8 (s, 3C, *para*-CH), 128.5 (s, 6C, *meta*-CH), 129.8 (d, 6C,  $^3J_{\text{P-C}} = 9.5$  Hz, *ortho*-CH), 143.1 (d, 3C,  $^2J_{\text{P-C}} = 8.5$  Hz, *ipso*-C).  $^{31}\text{P}\{^1\text{H}\}$  NMR (202 MHz,  $\text{CDCl}_3$ )  $\delta$  (ppm) = 212.1 (s).  $^{31}\text{P}$  NMR (202 MHz,  $\text{CDCl}_3$ )  $\delta$  (ppm) = 212.1 (d,  $^2J_{\text{P-H}} = 21.5$  Hz) MS (APCI)  $m/z$  (%) = 243.117 (100) [CPh<sub>3</sub>]<sup>+</sup>, 319.125 (2) [M+H]<sup>+</sup>, 335.120 (24) [M+O+H]<sup>+</sup>. HRMS (APCI): theor./exp. 319.1246/319.1244 [M+H]<sup>+</sup>.





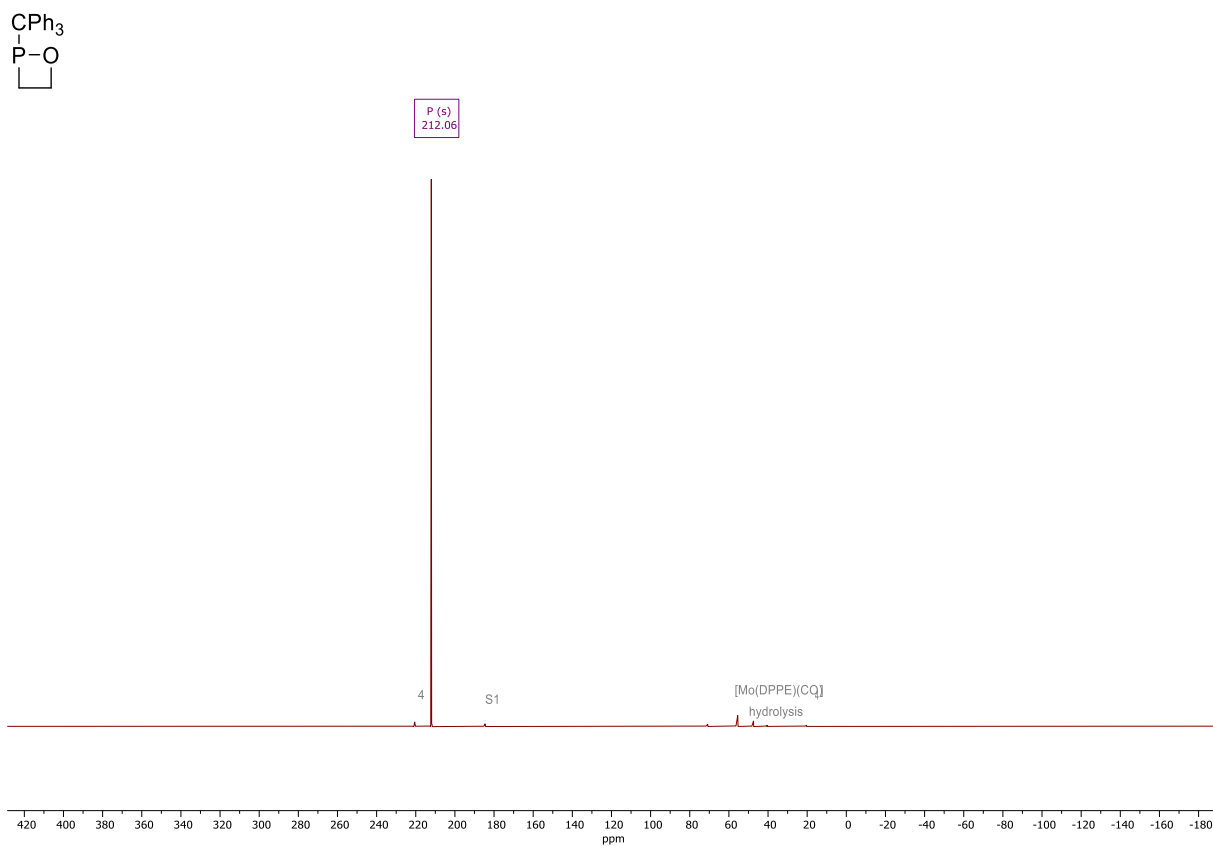

Figure S11:  $^{31}\text{P}\{^1\text{H}\}$ -NMR spectrum of **6** in  $\text{CDCl}_3$ .

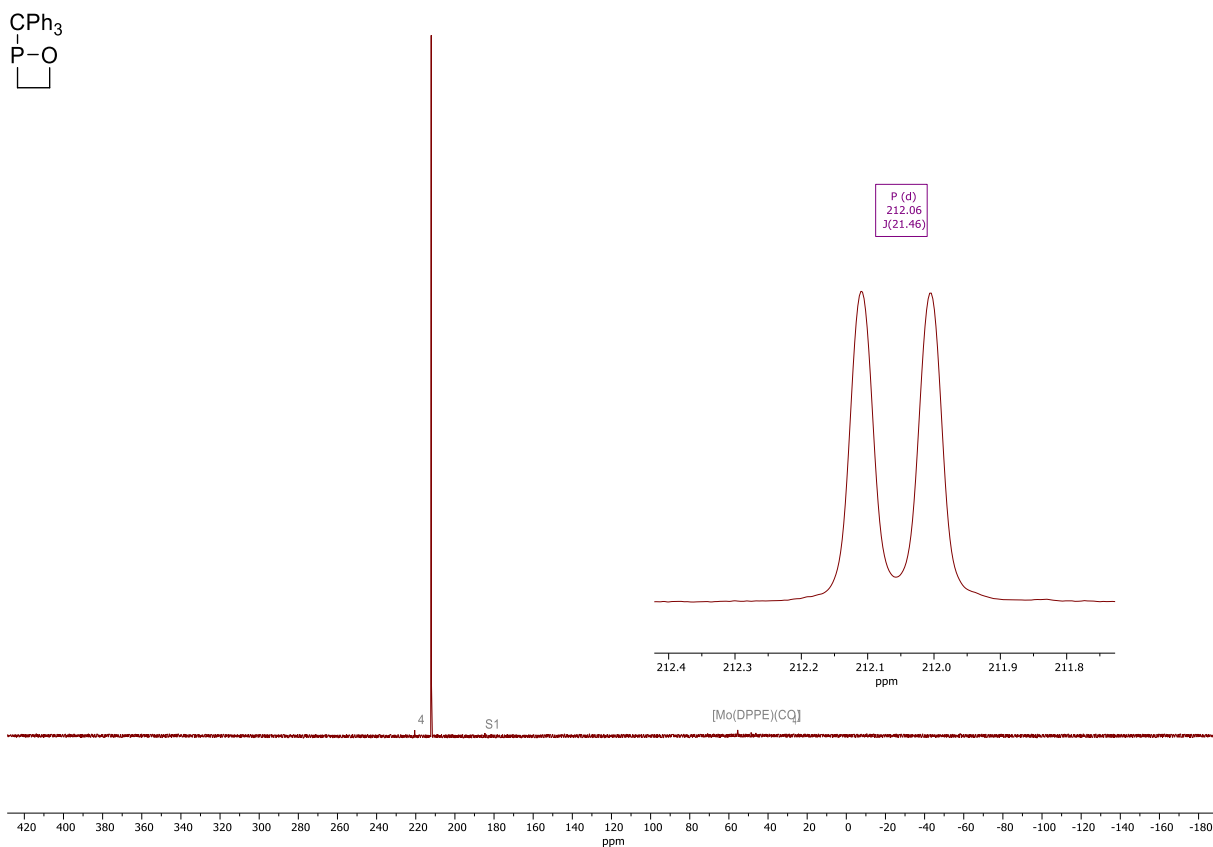

Figure S12:  $^{31}\text{P}\{^1\text{H}\}$ -NMR spectrum of **6** in  $\text{CDCl}_3$ .

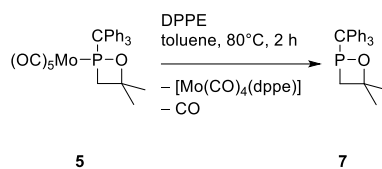

**Synthesis of 7:** 116.5 mg (0.2 mmol, 1 eq) of **7** and 79.7 mg (0.2 mmol, 1 eq) 1,2-bis(diphenylphosphino)ethane (DPPE) were dissolved in 15 mL toluene and heated to 80 °C for 2 h. The formation of **7** can be observed in the  $^{31}\text{P}\{^1\text{H}\}$ -NMR spectrum. Further heating leads to decomposition. The product **7** could not be isolated.

$^{31}\text{P}\{^1\text{H}\}$  NMR (121 MHz, toluene)  $\delta$  (ppm) = 161.2 (s).

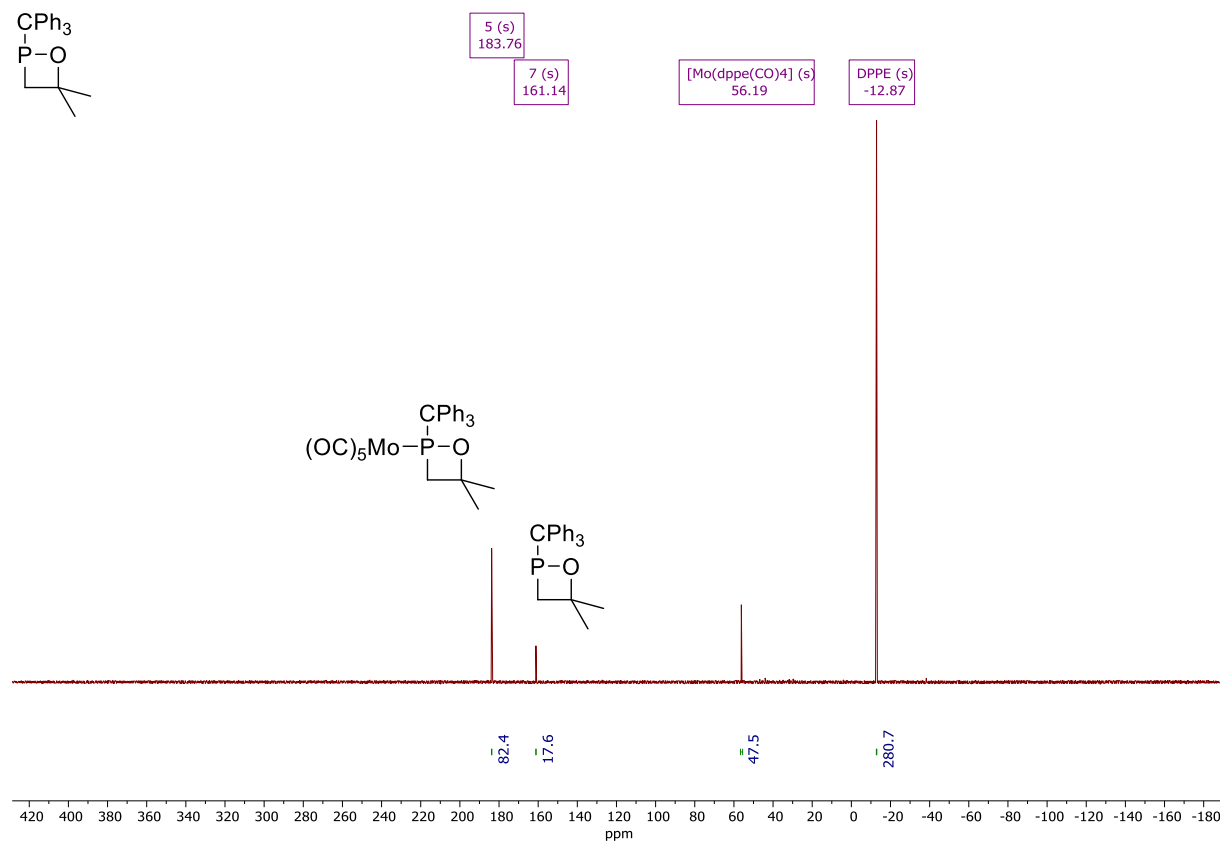

**Figure S13:**  $^{31}\text{P}\{^1\text{H}\}$ -NMR spectrum of reaction mixture of **7** in toluene.

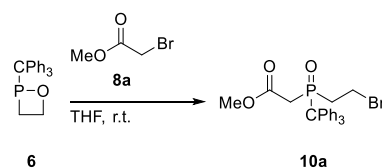

**Synthesis of 10a:** 111.4 mg (0.35 mmol, 1 eq) of **6** was dissolved in 10 mL THF. 0.21 mL (2.24 mmol, 1 eq) methyl 2-bromoacetate (**8a**) was added at room temperature. The reaction was stirred for 6 days. After evaporation of all volatile components in vacuo (0.02 mbar), 5 mL Et<sub>2</sub>O and 5 mL *n*-pentane were added. The gooey crude product was scratched in presence of the solvents. After evaporation of solvents in vacuo (0.02 mbar), the crude product was obtained as a white powder. The crude product was washed with *n*-pentane (five times 5 ml) at ambient temperature. After drying, the product was obtained as white powder.

Yield: 69.7 mg, 0.15 mmol, 42%.  $^1\text{H NMR}$  (500 MHz,  $\text{CDCl}_3$ )  $\delta$  (ppm) = 2.43 (m, 1H,  $\text{BrCH}_2\text{-CH}_2$ ), 2.48 (dd, 1H,  $^2J_{\text{H-H}} = 13.9$  Hz,  $^2J_{\text{P-H}} = 10.4$  Hz,  $\text{-C(O)-CH}_2$ ), 2.60 (dtd, 1H,  $^2J_{\text{H-H}} = 14.7$  Hz,  $^2J_{\text{P-H}} = 12.3$  Hz,  $^3J_{\text{H-H}} = 12.3$  Hz,  $^3J_{\text{H-H}} = 5.3$  Hz,  $\text{BrCH}_2\text{-CH}_2$ ), 3.15 (dd, 1H,  $^2J_{\text{P-H}} = 14.4$  Hz,  $^2J_{\text{H-H}} = 14.4$  Hz,  $\text{-C(O)-CH}_2$ ), 3.53 (m, 2H,  $\text{-CH}_2\text{Br}$ ), 3.70 (s, 3H,  $\text{-CH}_3$ ), 7.33 (m, 10H,  $\text{-CH}$ ), 7.57 ( $s_{\text{br}}$ , 5H,  $\text{-CH}$ ).  $^1\text{H}\{^{31}\text{P}\}$  NMR (500 MHz,  $\text{CDCl}_3$ )  $\delta$  (ppm) = 2.43 (m, 1H,  $\text{BrCH}_2\text{-CH}_2$ ), 2.48 (d, 1H,  $^2J_{\text{H-H}} = 13.9$  Hz,  $\text{-C(O)-CH}_2$ ), 2.60 (ddd, 1H,  $^2J_{\text{H-H}} = 14.7$  Hz,  $^3J_{\text{H-H}} = 12.7$  Hz,  $^3J_{\text{H-H}} = 5.4$  Hz,  $\text{BrCH}_2\text{-CH}_2$ ), 3.15 (d, 1H,  $^2J_{\text{H-H}} = 13.9$  Hz,  $\text{-C(O)-CH}_2$ ), 3.53 (m, 2H,  $\text{-CH}_2\text{Br}$ ), 3.70 (s, 3H,  $\text{-CH}_3$ ), 7.33 (m, 10H,  $\text{-CH}$ ), 7.57 ( $s_{\text{br}}$ , 5H,  $\text{-CH}$ ).  $^{13}\text{C NMR}$  (126 MHz, 298 K,  $\text{CDCl}_3$ ):  $\delta$  / ppm = 25.3 (s, 1C,  $\text{-CH}_2\text{Br}$ ), 33.8 (d, 1C,  $^1J_{\text{P-C}} = 58.0$  Hz,  $\text{BrCH}_2\text{-CH}_2$ ), 37.6 (d, 1C,  $^1J_{\text{P-C}} = 54.0$  Hz,  $\text{-C(O)-CH}_2$ ), 52.8 (s, 1C,  $\text{-CH}_3$ ), 63.6 (d, 1C,  $^1J_{\text{P-C}} = 60.8$  Hz,  $\text{-CPh}_3$ ), 127.8 (s, 3C, *para*-CH), 128.8 (s, 6C, *meta*-CH), 130.5 (s, 6C, *ortho*-CH), 141.0 ( $s_{\text{br}}$ , 3C, *ipso*-C), 167.1 (d, 1C,  $^2J_{\text{P-C}} = 5.18$  Hz,  $\text{-C(O)}$ ).  $^{31}\text{P}\{^1\text{H}\}$  NMR (202 MHz,  $\text{CDCl}_3$ )  $\delta$  (ppm) = 48.4 (s). MS (ESI+)  $m/z$  (%): 243.116 (100)  $[\text{CPh}_3]^+$ , 471.071 (30)  $[\text{M}+\text{H}]^+$ , 493.052 (21)  $[\text{M}+\text{Na}]^+$ . HRMS (APCI): theor./exp. 471.0719/471.0708  $[\text{M}+\text{H}]^+$ .

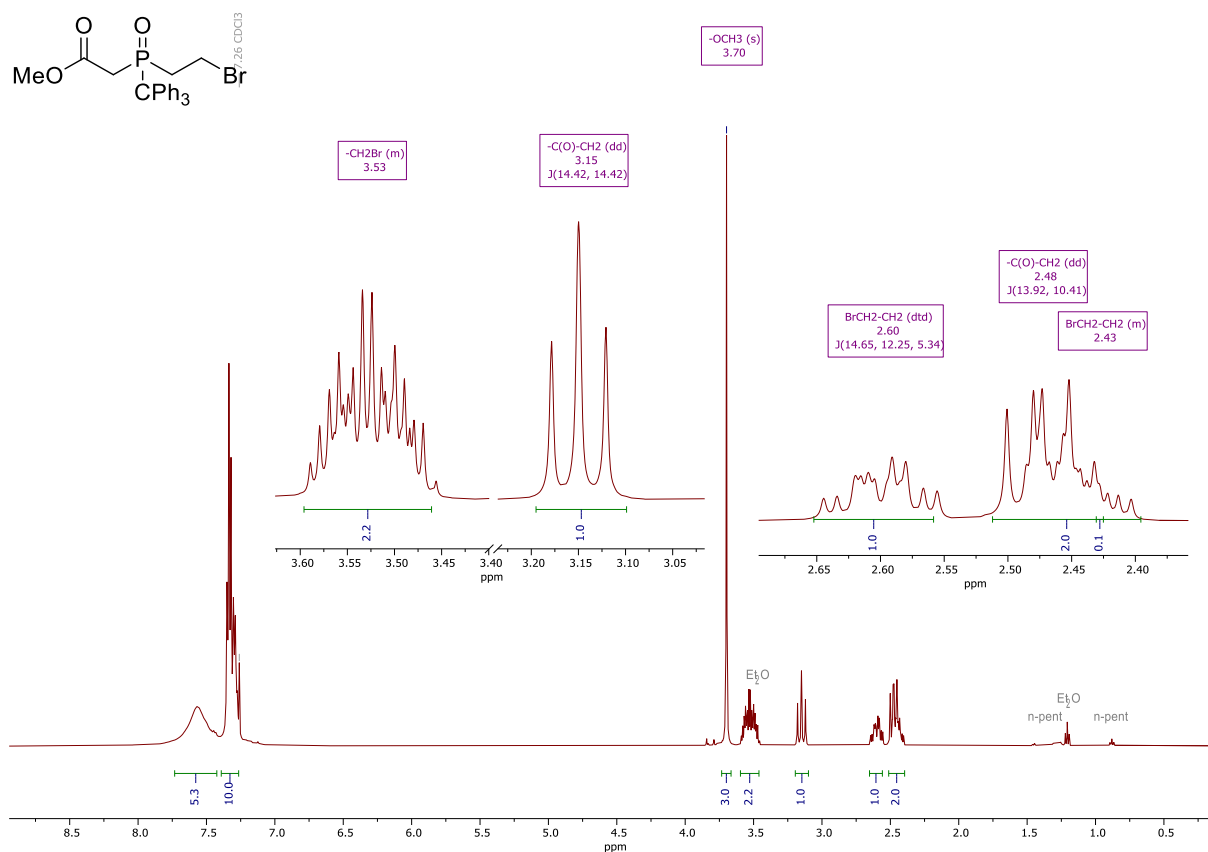

Figure S14:  $^1\text{H-NMR}$  spectrum of **10a** in  $\text{CDCl}_3$ .

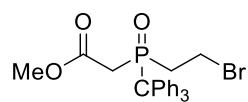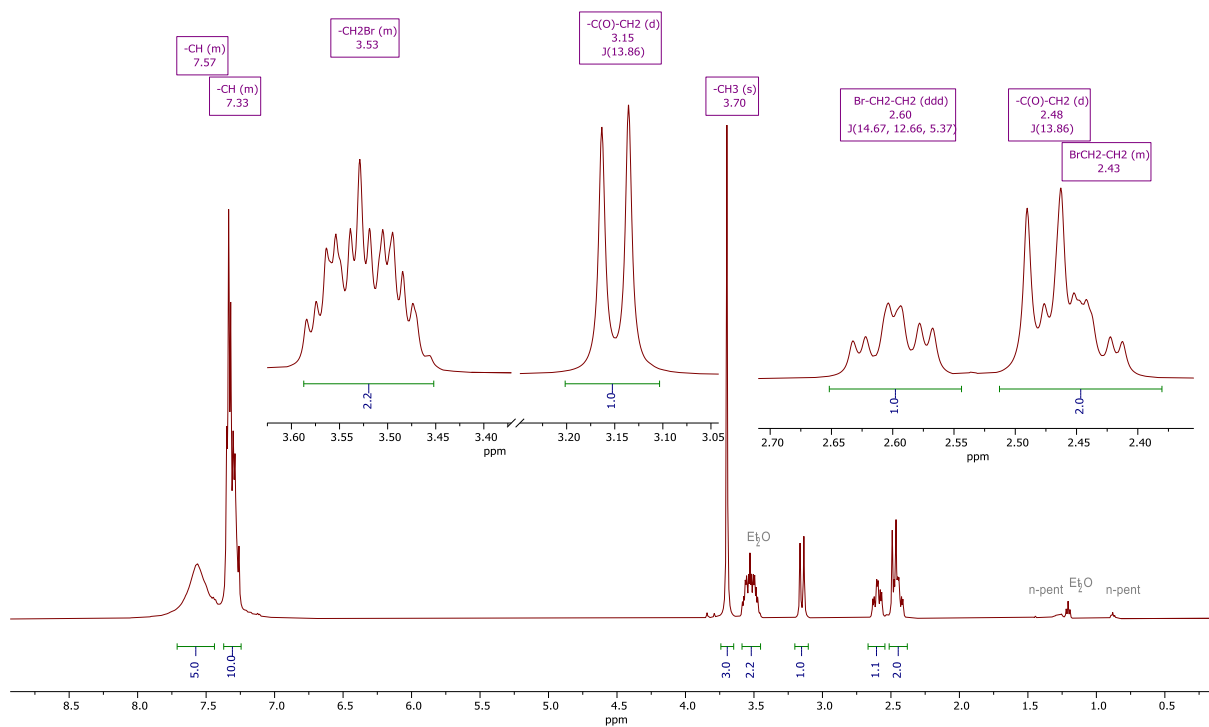

Figure S15:  $^1\text{H}$  ( $^{31}\text{P}$ )-NMR spectrum of **10a** in  $\text{CDCl}_3$ .

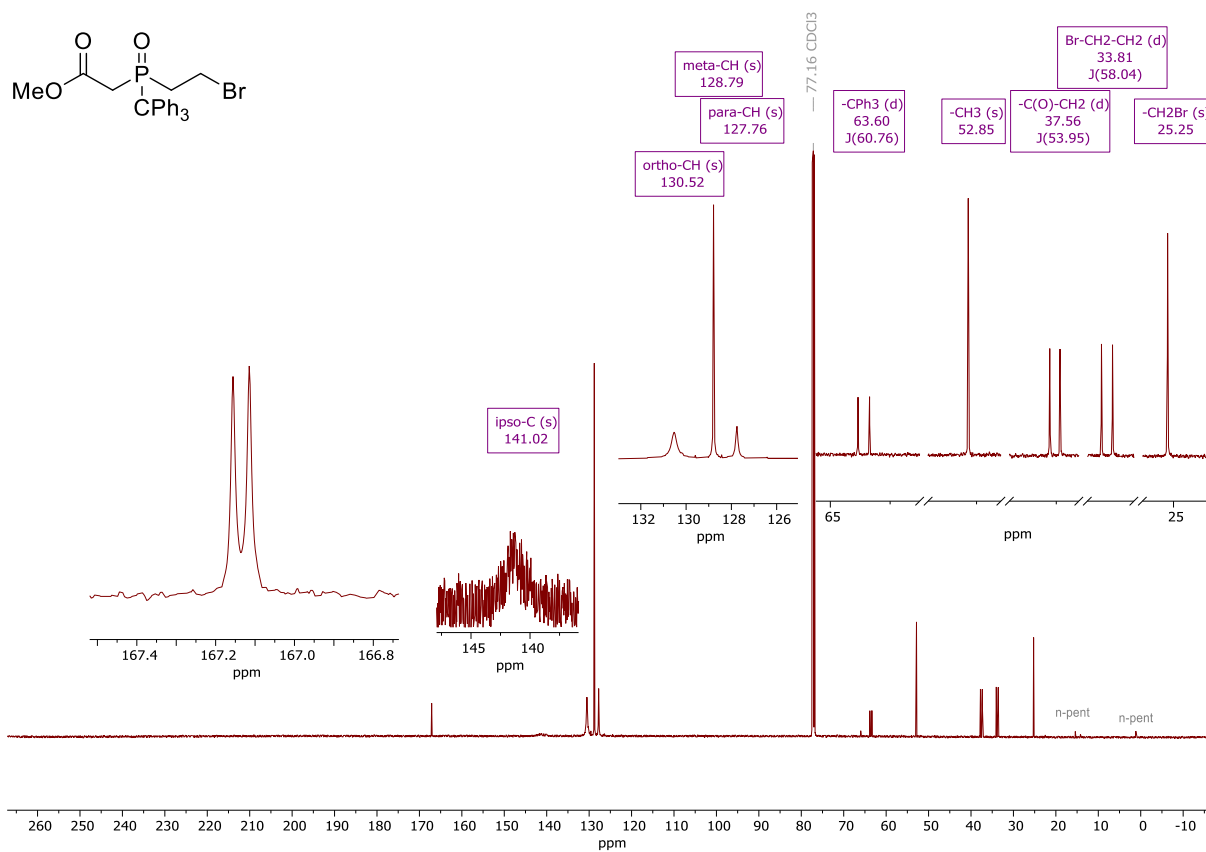

Figure S16:  $^{13}\text{C}$  ( $^1\text{H}$ )-NMR spectrum of **10a** in  $\text{CDCl}_3$ .

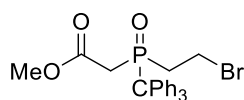

P (s)  
48.40

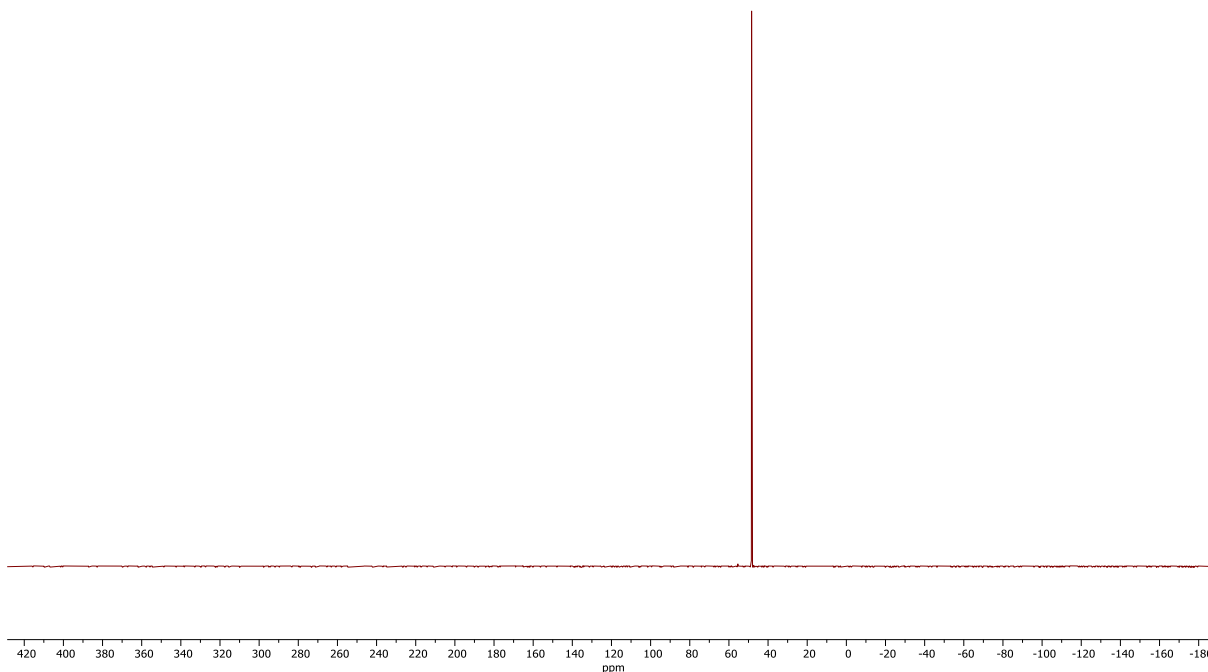

Figure S17:  $^{31}\text{P}\{^1\text{H}\}$ -NMR spectrum of **10a** in  $\text{CDCl}_3$ .

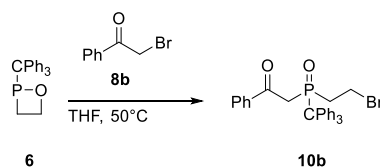

**Synthesis of 10b:** 159.2 mg **6** (0.5 mmol) was dissolved in 10 mL THF. 99.5 mg (0.5 mmol, 1 eq) of 2-bromoacetophenone (**8b**) was added at room temperature. The reaction was heated to 50°C and stirred for 3 days. After evaporation of all volatile components in vacuo (0.02 mbar), the crude product was washed at -80°C with *n*-pentane (once 10 mL) and with a 5:2 mixture of *n*-Pentane and  $\text{Et}_2\text{O}$  (three times 7 mL). After evaporation of all volatile components and drying in vacuo (0.02 mbar) the product was obtained as white powder.

Yield: 136.4 mg, 0.27 mmol, 53%.  $^1\text{H NMR}$  (500 MHz,  $\text{CDCl}_3$ )  $\delta$  (ppm) = 2.44 (dddd, 1H,  $^2J_{\text{H-H}} = 14.6$  Hz,  $^3J_{\text{H-H}} = 12.4$  Hz,  $^2J_{\text{P-H}} = 9.3$  Hz,  $^3J_{\text{H-H}} = 5.1$  Hz,  $\text{BrCH}_2\text{-CH}_2$ ), 2.56 (m, 1H,  $\text{BrCH}_2\text{-CH}_2$ ), 2.98 (dd, 1H,  $^2J_{\text{H-H}} = 13.3$  Hz,  $^2J_{\text{P-H}} = 11.1$  Hz,  $\text{-C(O)-CH}_2$ ), 3.32 (dddd, 1H,  $^3J_{\text{H-H}} = 12.7$  Hz,  $^2J_{\text{H-H}} = 10.0$  Hz,  $^2J_{\text{P-H}} = 4.9$  Hz,  $^3J_{\text{H-H}} = 4.9$  Hz,  $\text{-CH}_2\text{Br}$ ), 3.51 (dddd, 1H,  $^3J_{\text{H-H}} = 12.4$  Hz,  $^2J_{\text{H-H}} = 10.2$  Hz,  $^2J_{\text{P-H}} = 5.1$  Hz,  $^3J_{\text{H-H}} = 5.1$  Hz,  $\text{-CH}_2\text{Br}$ ), 4.07 (dd, 1H,  $^2J_{\text{P-H}} = 16.2$  Hz,  $^2J_{\text{H-H}} = 13.3$  Hz,  $\text{-C(O)-CH}_2$ ), 7.33 (m, 10H,  $\text{-CPh}_2\text{CH}$ ), 7.46 (t, 2H,  $^3J_{\text{H-H}} = 7.8$  Hz, *meta-CH*), 7.58 (t, 1H,  $^3J_{\text{H-H}} = 7.4$  Hz, *para-CH*), 7.62 ( $s_{\text{br}}$ , 5H,  $\text{-CPh}_2\text{CH}$ ), 7.90 (d, 2H,  $^3J_{\text{H-H}} = 7.1$  Hz, *ortho-CH*).  $^1\text{H}\{^{31}\text{P}\}$  NMR (500 MHz,  $\text{CDCl}_3$ )  $\delta$  (ppm) = 2.44 (ddd, 1H,  $^2J_{\text{H-H}} = 14.8$  Hz,  $^3J_{\text{H-H}} = 12.4$  Hz,  $^3J_{\text{H-H}} = 5.1$  Hz,  $\text{BrCH}_2\text{-CH}_2$ ), 2.56 (ddd, 1H,  $^2J_{\text{H-H}} = 11.3$  Hz,  $^3J_{\text{H-H}} = 11.3$  Hz,  $^3J_{\text{H-H}} = 6.4$  Hz,  $\text{BrCH}_2\text{-CH}_2$ ), 2.98 (d, 1H,  $^2J_{\text{H-H}} = 13.3$  Hz,  $\text{-C(O)-CH}_2$ ), 3.32 (ddd, 1H,  $^2J_{\text{H-H}} = 11.5$  Hz,  $^3J_{\text{H-H}} = 10.2$  Hz,  $^3J_{\text{H-H}} = 5.1$  Hz,  $\text{-CH}_2\text{Br}$ ), 3.51 (ddd, 1H,  $^3J_{\text{H-H}} = 12.4$  Hz,  $^2J_{\text{H-H}} = 12.4$  Hz,  $^3J_{\text{H-H}} = 5.0$  Hz,  $\text{-CH}_2\text{Br}$ ), 4.07 (d, 1H,  $^2J_{\text{H-H}} = 13.3$  Hz,  $\text{-C(O)-CH}_2$ ), 7.33 (m, 10H,  $\text{-CPh}_2\text{CH}$ ), 7.46 (t, 2H,  $^3J_{\text{H-H}} = 7.8$  Hz, *meta-CH*), 7.58 (t, 1H,  $^3J_{\text{H-H}} = 7.4$  Hz, *para-CH*), 7.62 ( $s_{\text{br}}$ , 5H,  $\text{-CPh}_2\text{CH}$ ), 7.90 (d, 2H,  $^3J_{\text{H-H}} = 7.8$  Hz, *ortho-CH*).  $^{13}\text{C NMR}$  (126 MHz, 298 K,  $\text{CDCl}_3$ ):  $\delta$  / ppm = 25.3 (s, 1C,  $\text{-CH}_2\text{Br}$ ), 33.6 (d, 1C,  $^1J_{\text{P-C}} = 56.7$  Hz,  $\text{BrCH}_2\text{-CH}_2$ ), 40.7 (d, 1C,  $^1J_{\text{P-C}} = 51.5$  Hz,  $\text{-C(O)-CH}_2$ ), 64.0 (d, 1C,  $^1J_{\text{P-C}} = 59.1$  Hz,  $\text{-CPh}_3$ ), 127.7 ( $s_{\text{br}}$ , 3C, *para-CH*), 128.7 ( $s_{\text{br}}$ , 2C, *meta-CH*), 128.8 (s, 6C, *meta-CH*), 129.3 (s, 2C, *ortho-CH*) 130.6 ( $s_{\text{br}}$ , 6C, *ortho-CH*), 133.9 (s, 1C, *para-CH*), 137.4 (s, 1C,  $\text{-C(O)-ipso-C}$ ), 141.6 ( $s_{\text{br}}$ , 3C,  $\text{Ph}_3\text{-ipso-C}$ ), 194.3 (d, 1C,  $^2J_{\text{P-C}} = 5.7$ ,  $\text{-C(O)}$ ).  $^{31}\text{P}\{^1\text{H}\}$  NMR (202 MHz,  $\text{CDCl}_3$ )  $\delta$  (ppm) = 49.7 (s). **MS** (ESI+)  $m/z$  (%): 243.117 (100)  $[\text{CPh}_3]^+$ , 437.166 (52)  $[\text{M-Br}]^+$ , 519.091 (13)  $[\text{M+H}]^+$ \*. **HRMS** (APCI): theor./exp. 517.0927/517.0928  $[\text{M+H}]^+$ . **Melting Point:** 157°C.

\*: program labelled  $^{81}\text{Br}$  containing isotopologue instead of the  $^{79}\text{Br}$  containing one.

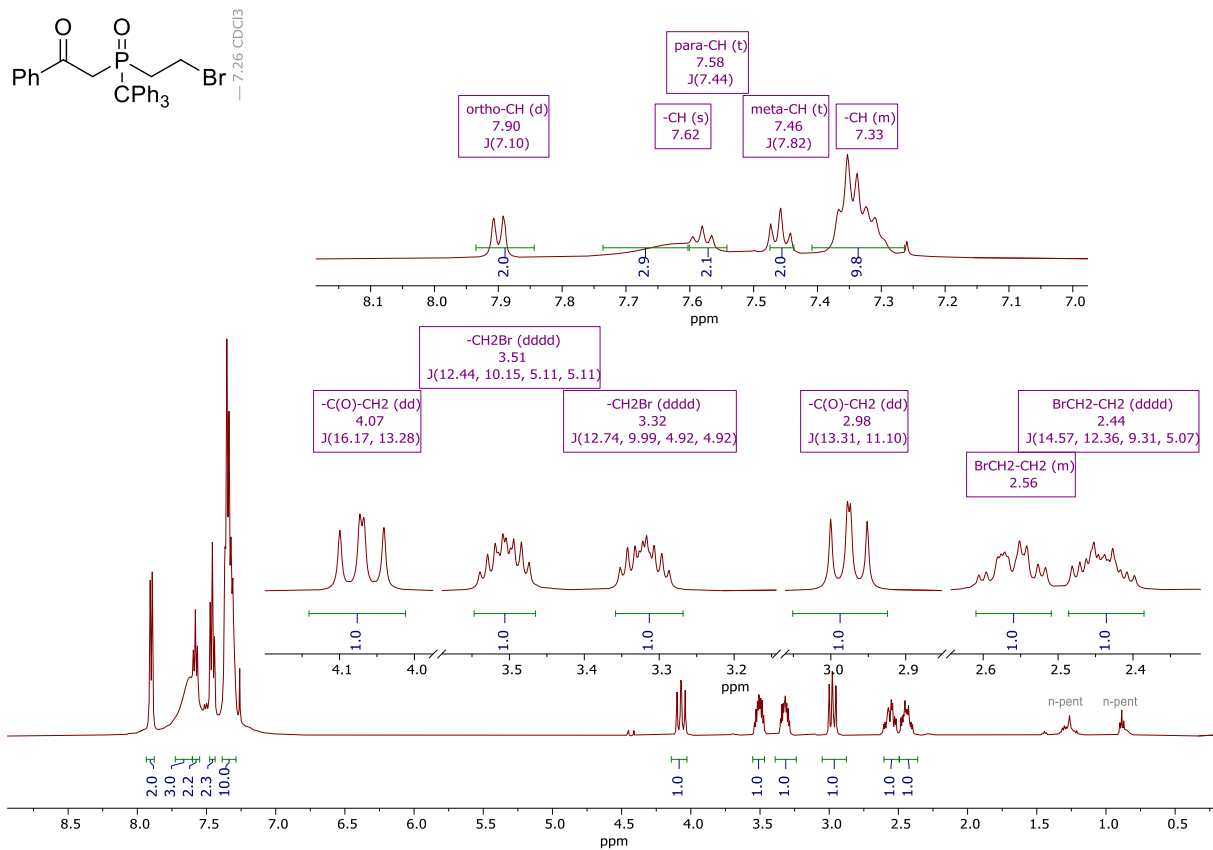

Figure S18:  $^1\text{H-NMR}$  spectrum of **10b** in  $\text{CDCl}_3$ .

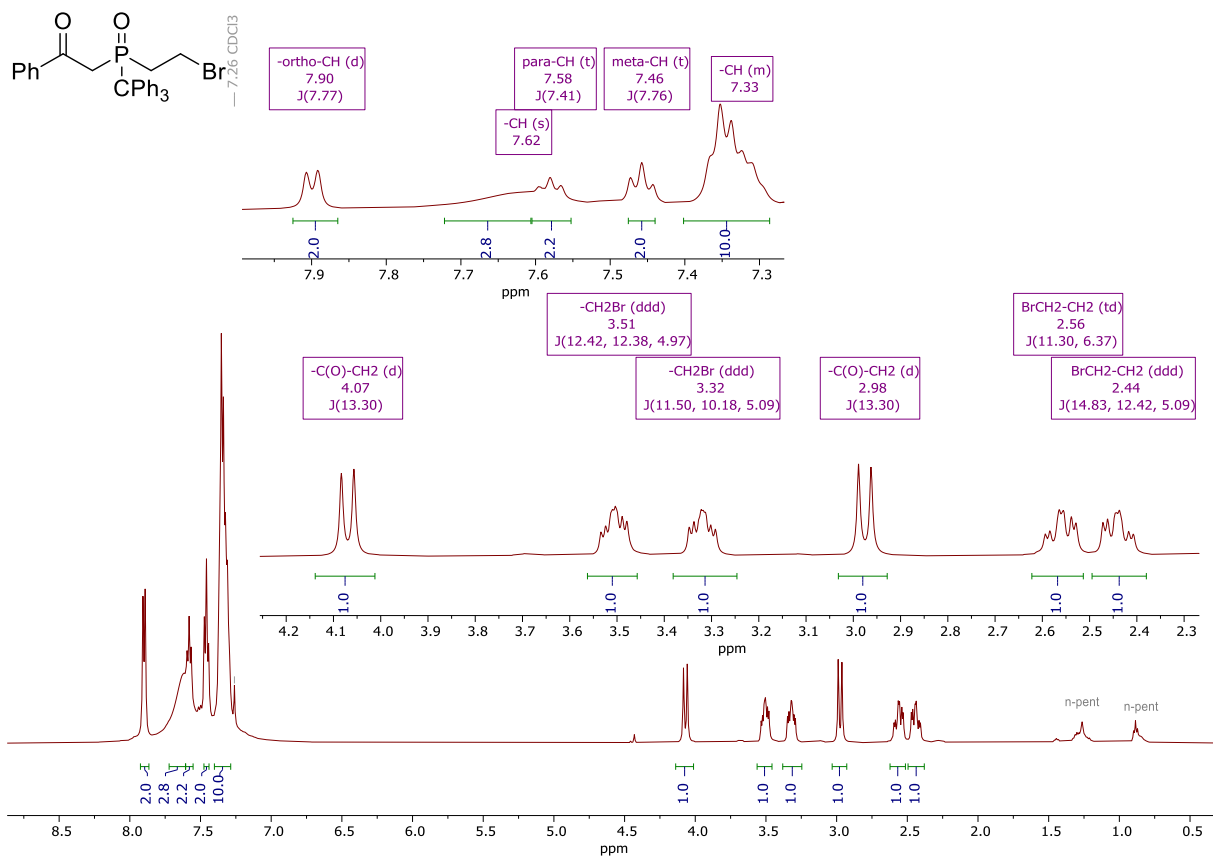

Figure S19:  $^1\text{H}(^{31}\text{P})\text{-NMR}$  spectrum of **10b** in  $\text{CDCl}_3$ .

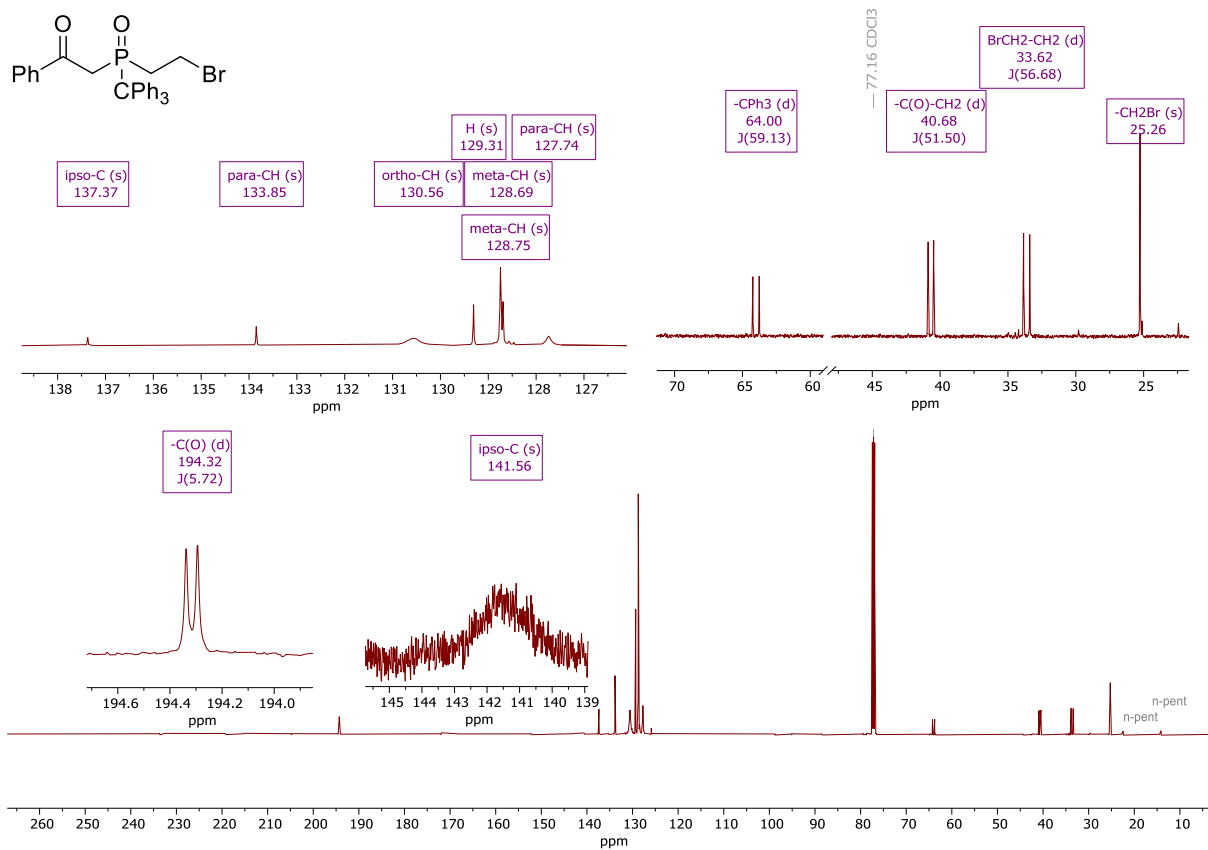

Figure S20:  $^{13}\text{C}\{^1\text{H}\}$ -NMR spectrum of **10b** in  $\text{CDCl}_3$ .

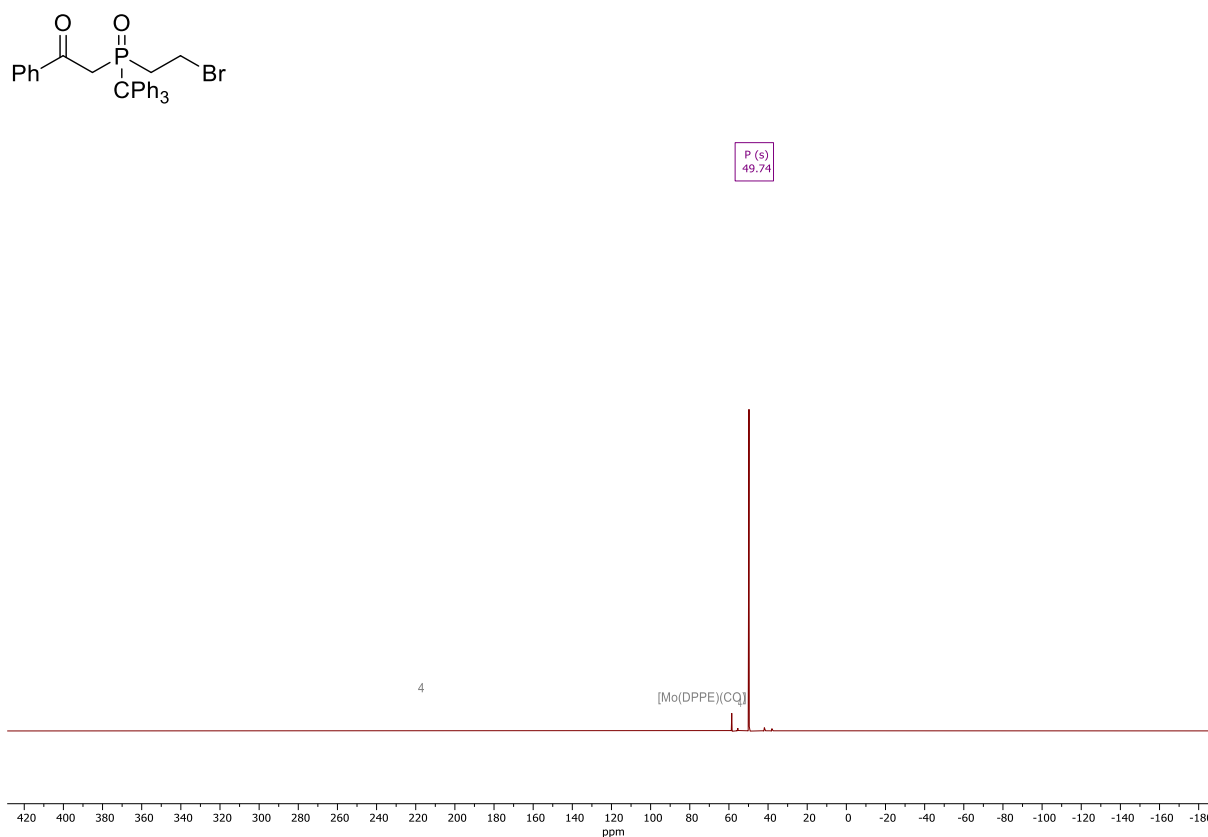

Figure S21:  $^{31}\text{P}\{^1\text{H}\}$ -NMR spectrum of **10b** in  $\text{CDCl}_3$ .



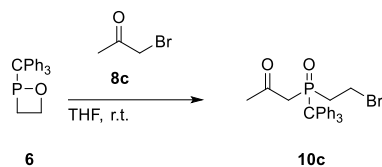

**Synthesis of 10c:** 159.2 mg **6** (0.5 mmol, 1 eq) was dissolved in 15 mL THF. 0.13 mL (1.5 mmol, 3 eq) bromoacetone (**8c**) was added at room temperature. The reaction was stirred for 7 days. After evaporation of all volatile components in vacuo (0.02 mbar), the crude product was washed at ambient temperature (twice with Et<sub>2</sub>O:*n*-pentane 1:1, 10 mL; once with 5 mL *n*-pentane). After evaporation of all volatile components and drying in vacuo (0.02 mbar) the product was obtained as white powder.

Yield: 30.8 mg, 0.03 mmol, 6%. <sup>1</sup>H NMR (500 MHz, CDCl<sub>3</sub>) δ (ppm) = 2.27 (m, 1H, BrCH<sub>2</sub>-CH<sub>2</sub>), 2.33 (s, 3H, -CH<sub>3</sub>), 2.50 (m, 1H, BrCH<sub>2</sub>-CH<sub>2</sub>), 2.50 (m, 1H, -C(O)-CH<sub>2</sub>), 3.37 (m, 1H, -CH<sub>2</sub>Br), 3.42 (m, 1H, -C(O)-CH<sub>2</sub>), 3.48 (m, 1H, -CH<sub>2</sub>Br), 7.32 (m, 10H, -CH), 7.58 (m, 5H, -CH). <sup>13</sup>C NMR (126 MHz, 298 K, CDCl<sub>3</sub>): δ / ppm = 24.8 (s, 1C, -CH<sub>2</sub>Br), 33.3 (s, 1C, -CH<sub>3</sub>), 33.9 (d, 1C, <sup>1</sup>J<sub>P-C</sub> = 57.2 Hz, CH<sub>2</sub>Br-CH<sub>2</sub>), 45.3 (d, 1C, <sup>1</sup>J<sub>P-C</sub> = 50.1 Hz, -C(O)-CH<sub>2</sub>), 63.6 (d, 1C, <sup>1</sup>J<sub>P-C</sub> = 59.6 Hz, -CPh<sub>3</sub>), 127.8 (s<sub>br</sub>, 3C, *para*-CH), 128.8 (s<sub>br</sub>, 6C, *meta*-CH), 130.4 (s, 6C, *ortho*-CH), 141.3 (s<sub>br</sub>, 3C, -CPh<sub>3</sub>), 202.6 (d, 1C, <sup>2</sup>J<sub>P-C</sub> = 5.2, -C(O)). <sup>31</sup>P{<sup>1</sup>H} NMR (202 MHz, CDCl<sub>3</sub>) δ (ppm) = 48.5 (s). MS (APCI) m/z (%) : 243.117 (100) [CPh<sub>3</sub>]<sup>+</sup>, 375.151 (13) [M-Br]<sup>+</sup>, 455.077 (13) [M+H]<sup>+</sup>. HRMS (APCI): theor./exp. 455.0770 /455.0769 [M+H]<sup>+</sup>. **Melting Point:** 116°C.

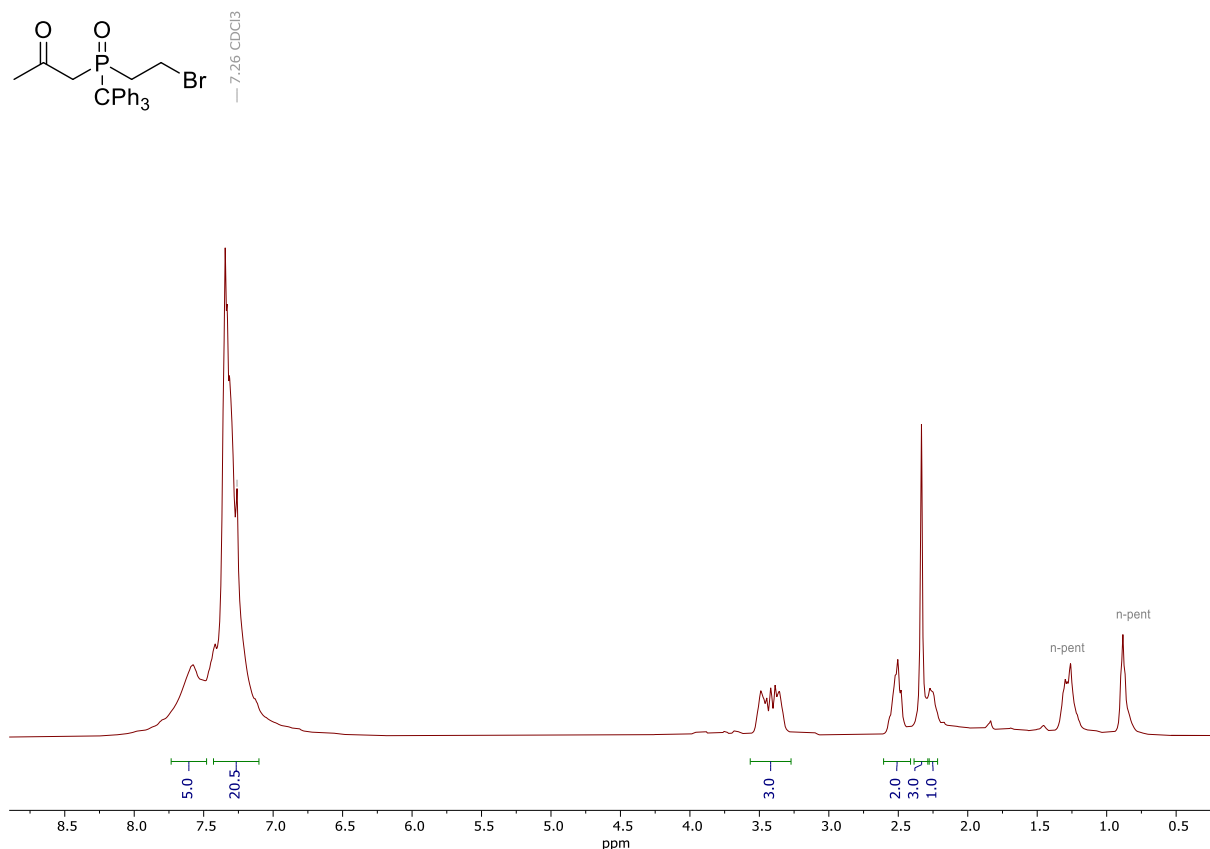

**Figure S22:** <sup>1</sup>H-NMR spectrum of **10c** in CDCl<sub>3</sub>.

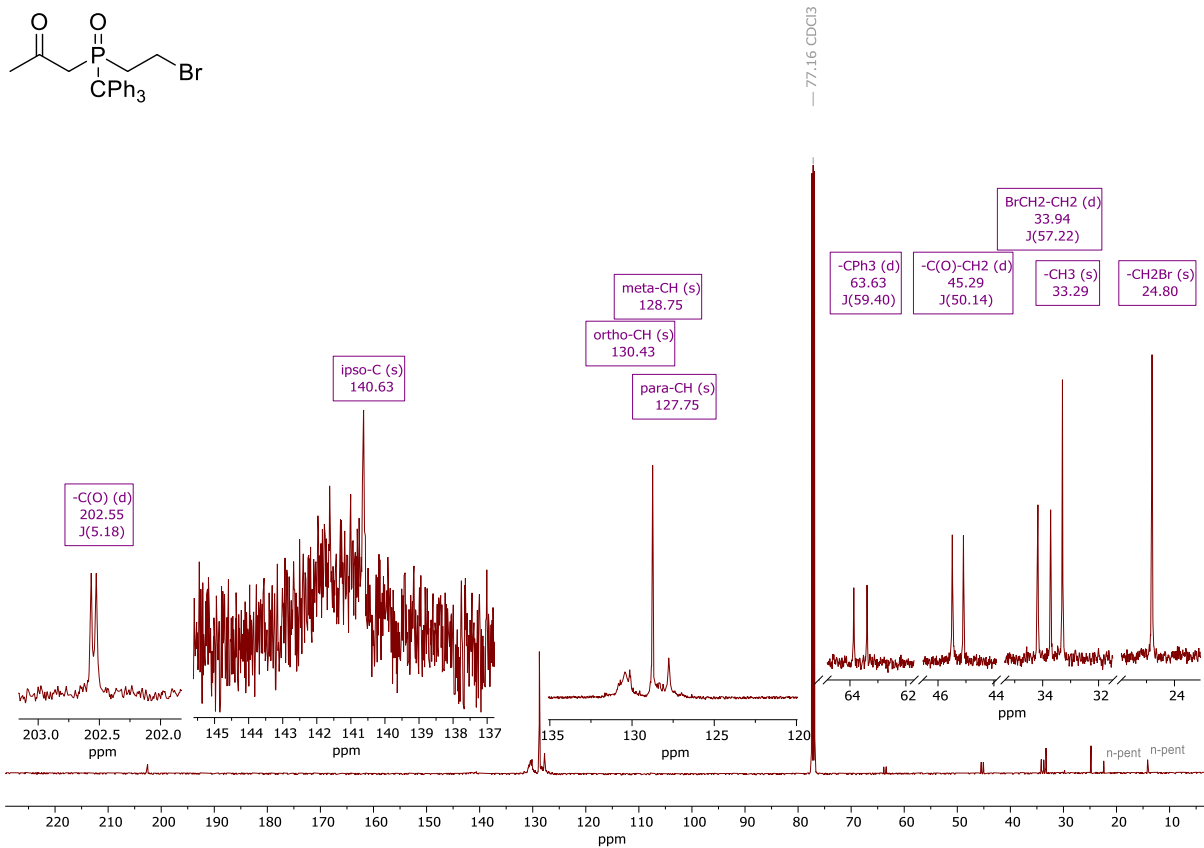

Figure S23:  $^{13}\text{C}\{^1\text{H}\}$ -NMR spectrum of **10c** in  $\text{CDCl}_3$ .

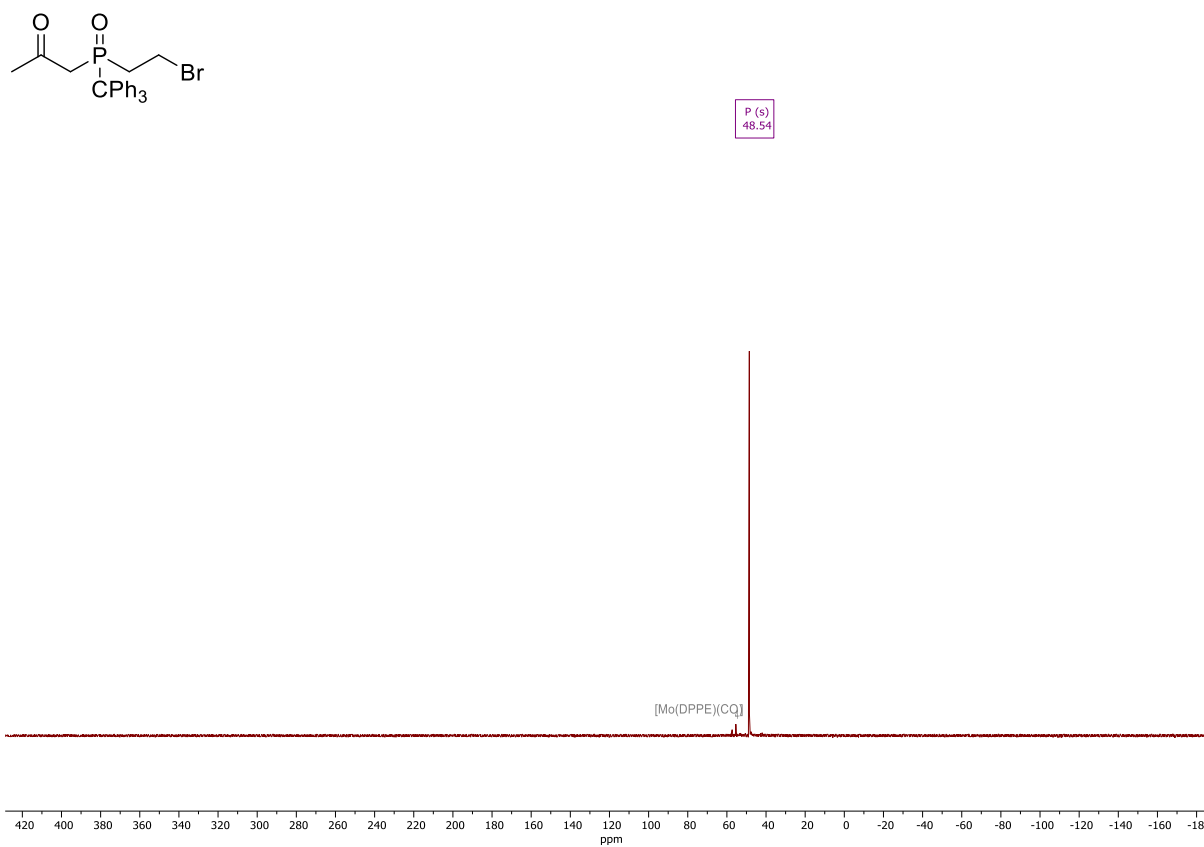

Figure S24:  $^{31}\text{P}\{^1\text{H}\}$ -NMR spectrum of **10c** in  $\text{CDCl}_3$ .

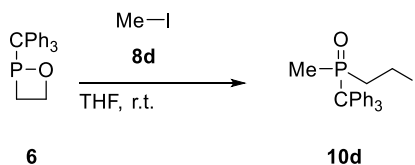

**Synthesis of 10c:** 159.2 mg **6** (0.5 mmol, 1 eq) was dissolved in 10 mL THF. 1.41 mL (0.5 mmol, 1 eq) iodomethane (**8d**) solution (0.3545 M in THF) was added at room temperature. The reaction was heated to 50°C and stirred for 2 days. After evaporation of all volatile components in vacuo (0.02 mbar), the crude product was washed with *n*-pentane (four times 10 mL) at -70°C. After evaporation of all volatile components and drying in vacuo (0.02 mbar) the product was obtained as white powder.

Yield: 93.8 mg, 0.29 mmol, 57%.  $^1\text{H NMR}$  (500 MHz,  $\text{CDCl}_3$ )  $\delta$  (ppm) = 1.43 (d, 3H,  $^2J_{\text{P-H}} = 11.8$  Hz,  $-\text{CH}_3$ ) 1.99 (dddd, 1H,  $^2J_{\text{H-H}} = 14.8$  Hz,  $^3J_{\text{H-H}} = 12.4$  Hz,  $^2J_{\text{P-H}} = 7.1$  Hz,  $^3J_{\text{H-H}} = 5.3$  Hz,  $\text{ICH}_2\text{-CH}_2$ ), 2.55 (dddd, 1H,  $^2J_{\text{P-H}} = 13.7$  Hz,  $^2J_{\text{H-H}} = 13.1$  Hz,  $^3J_{\text{H-H}} = 13.1$  Hz,  $^3J_{\text{H-H}} = 4.9$  Hz,  $\text{ICH}_2\text{-CH}_2$ ), 3.12 (dddd, 1H,  $^3J_{\text{H-H}} = 12.7$  Hz,  $^2J_{\text{P-H}} = 9.9$  Hz,  $^3J_{\text{H-H}} = 5.5$  Hz,  $^3J_{\text{P-H}} = 5.5$  Hz,  $-\text{CH}_2\text{I}$ ), 3.36 (dddd, 1H,  $^3J_{\text{H-H}} = 12.3$ ,  $^2J_{\text{H-H}} = 9.9$  Hz,  $^3J_{\text{P-H}} = 7.4$ ,  $^3J_{\text{H-H}} = 4.8$  Hz,  $-\text{CH}_2\text{I}$ ), 7.30 (m, 10H,  $-\text{CH}$ ), 7.56 ( $s_{\text{br}}$ , 5H,  $-\text{CH}$ ).  $^1\text{H}\{^31\text{P}\}$  NMR (500 MHz,  $\text{CDCl}_3$ )  $\delta$  (ppm) = 1.43 (s, 3H,  $-\text{CH}_3$ ) 1.99 (m, 1H,  $\text{ICH}_2\text{-CH}_2$ ), 2.55 (m, 1H,  $\text{ICH}_2\text{-CH}_2$ ), 3.12 (m, 1H,  $-\text{CH}_2\text{I}$ ), 3.36 (m, 1H,  $-\text{CH}_2\text{I}$ ), 7.30 (m, 10H,  $-\text{CH}$ ), 7.56 ( $s_{\text{br}}$ , 5H,  $-\text{CH}$ ).  $^{13}\text{C NMR}$  (126 MHz, 298 K,  $\text{CDCl}_3$ ):  $\delta$  / ppm = -5.6 (d, 1C,  $^2J_{\text{P-C}} = 3.3$  Hz,  $-\text{CH}_2\text{I}$ ), 14.9 (d, 1C,  $^1J_{\text{P-C}} = 67.0$  Hz,  $-\text{CH}_3$ ), 35.4 (d, 1C,  $^1J_{\text{P-C}} = 57.2$  Hz,  $\text{ICH}_2\text{-CH}_2$ ), 62.9 (d, 1C,  $^1J_{\text{P-C}} = 59.7$ ,  $-\text{CPh}_3$ ), 127.4 (s, 3C, *para*-CH), 128.5 (s, 6C, *meta*-CH), 130.6 (s, 6C, *meta*-CH), 142.0 ( $s_{\text{br}}$ , 3C, *ipso*-C).  $^{31}\text{P}\{^1\text{H}\}$  NMR (202 MHz,  $\text{CDCl}_3$ )  $\delta$  (ppm) = 53.6 (s). MS (APCI)  $m/z$  (%): 243.117 (100)  $[\text{CPh}_3]^+$ , 333.138 (2)  $[\text{M-I}]^+$ , 461.052 (35)  $[\text{M+H}]^+$ , 483.034 (5)  $[\text{M+Na}]^+$ . HRMS (APCI): theor./exp. 461.0526 /461.0526  $[\text{M+H}]^+$ . Melting Point: 149 °C.

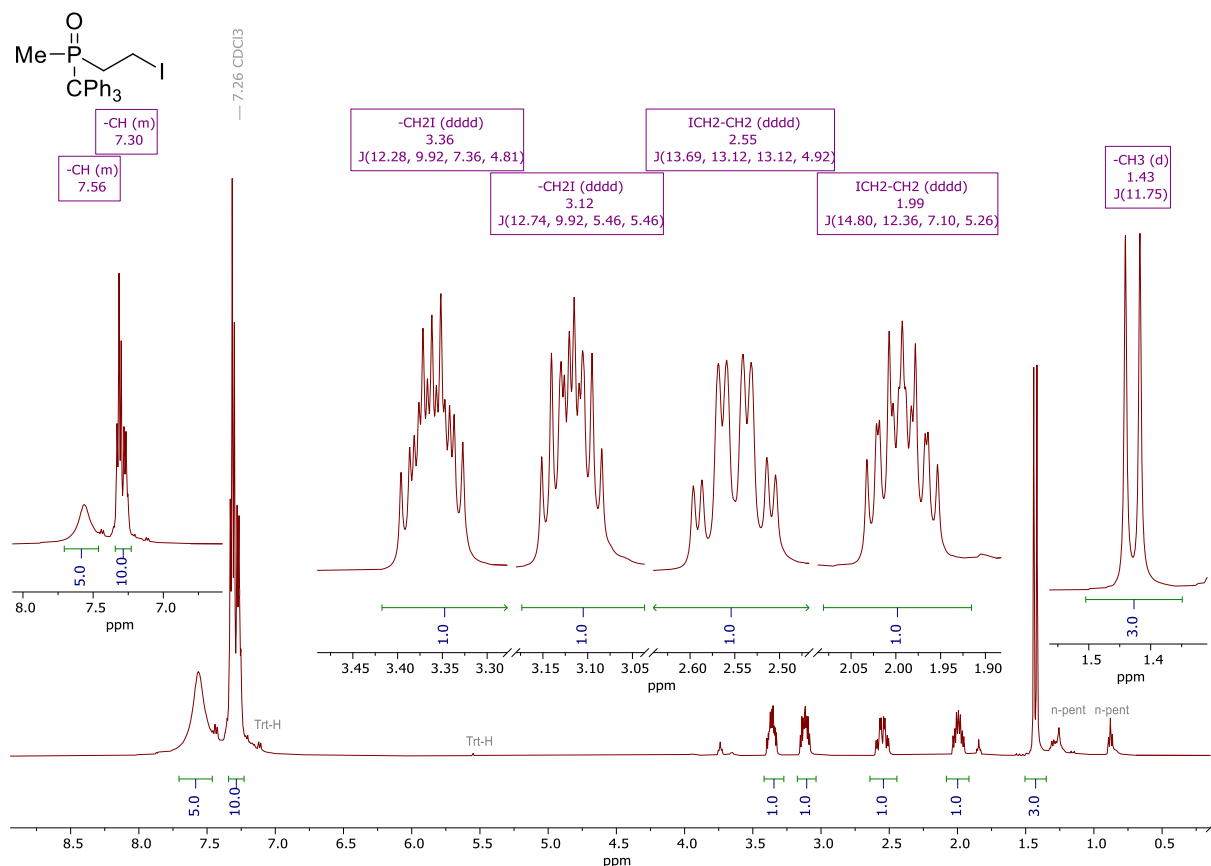

Figure S25:  $^1\text{H-NMR}$  spectrum of **10d** in  $\text{CDCl}_3$ .

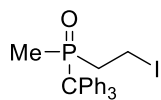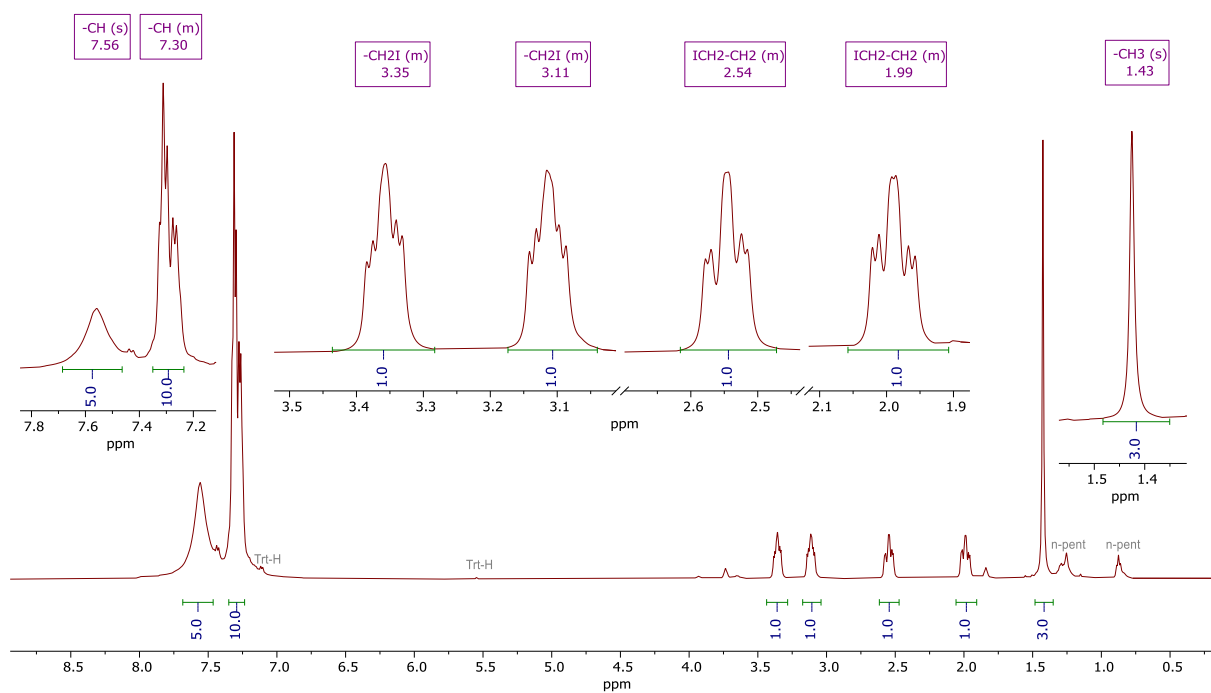

Figure S26:  $^1\text{H}(^{31}\text{P})$ -NMR spectrum of **10d** in  $\text{CDCl}_3$ .

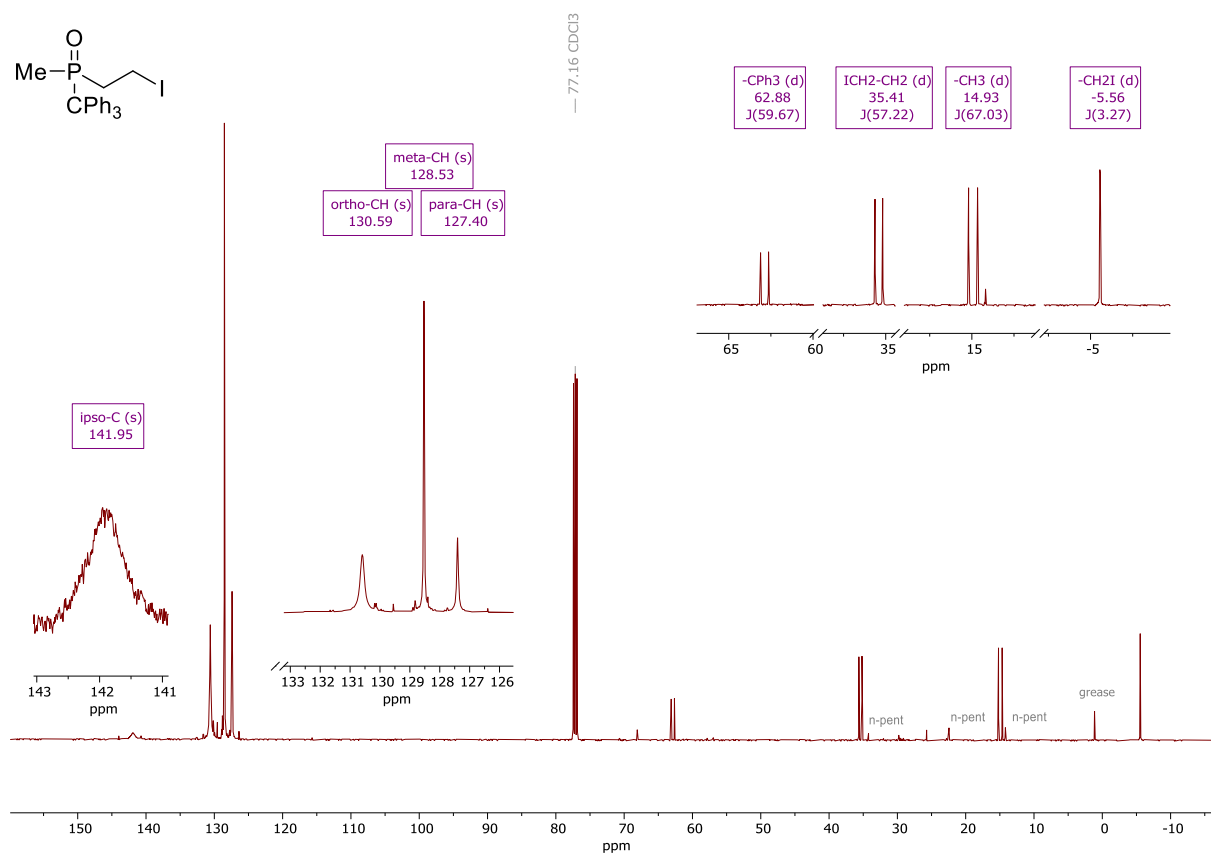

Figure S27:  $^{13}\text{C}(^1\text{H})$ -NMR spectrum of **10d** in  $\text{CDCl}_3$ .

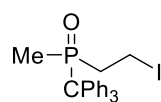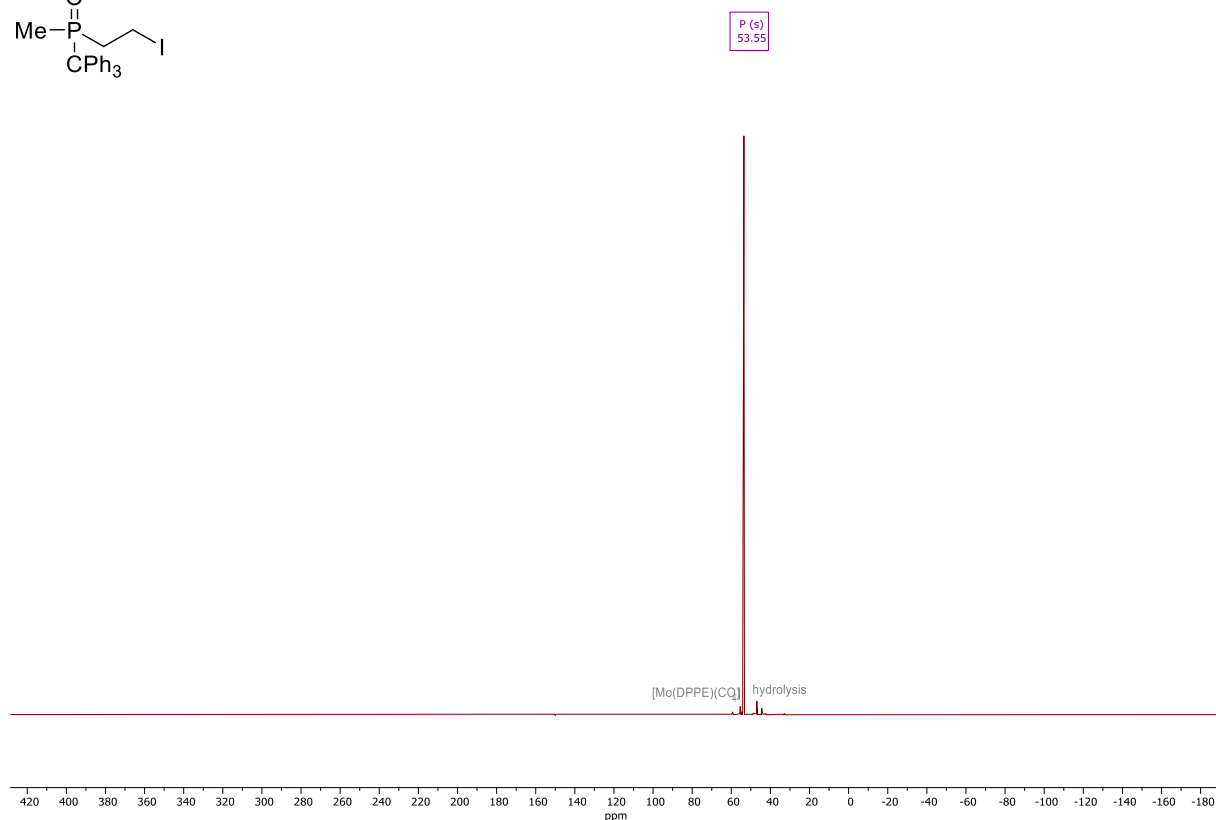

Figure S28:  $^{31}\text{P}\{^1\text{H}\}$ -NMR spectrum of **10d** in  $\text{CDCl}_3$ .

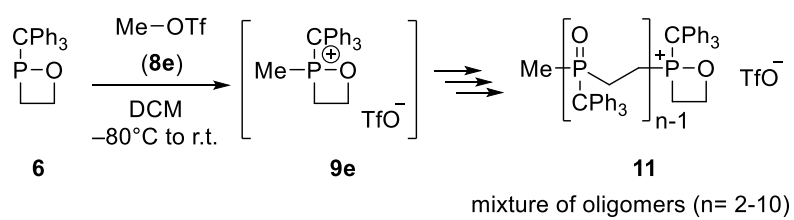

Synthesis of oligomers **11**: 63.7 mg **6** (0.2 mmol, 1 eq) was dissolved in 5 mL DCM, the solution was cooled to  $-80^\circ\text{C}$ . 0.02 mL (0.2 mmol, 1 eq) methyl triflate (**8e**) was added. After warming up to ambient temperature and evaporation of all volatile components in vacuo (0.02 mbar), the crude product was washed with  $\text{Et}_2\text{O}$  (three times 5 mL) at ambient temperature. The oligomers of **11** were obtained as pale-yellow solid.

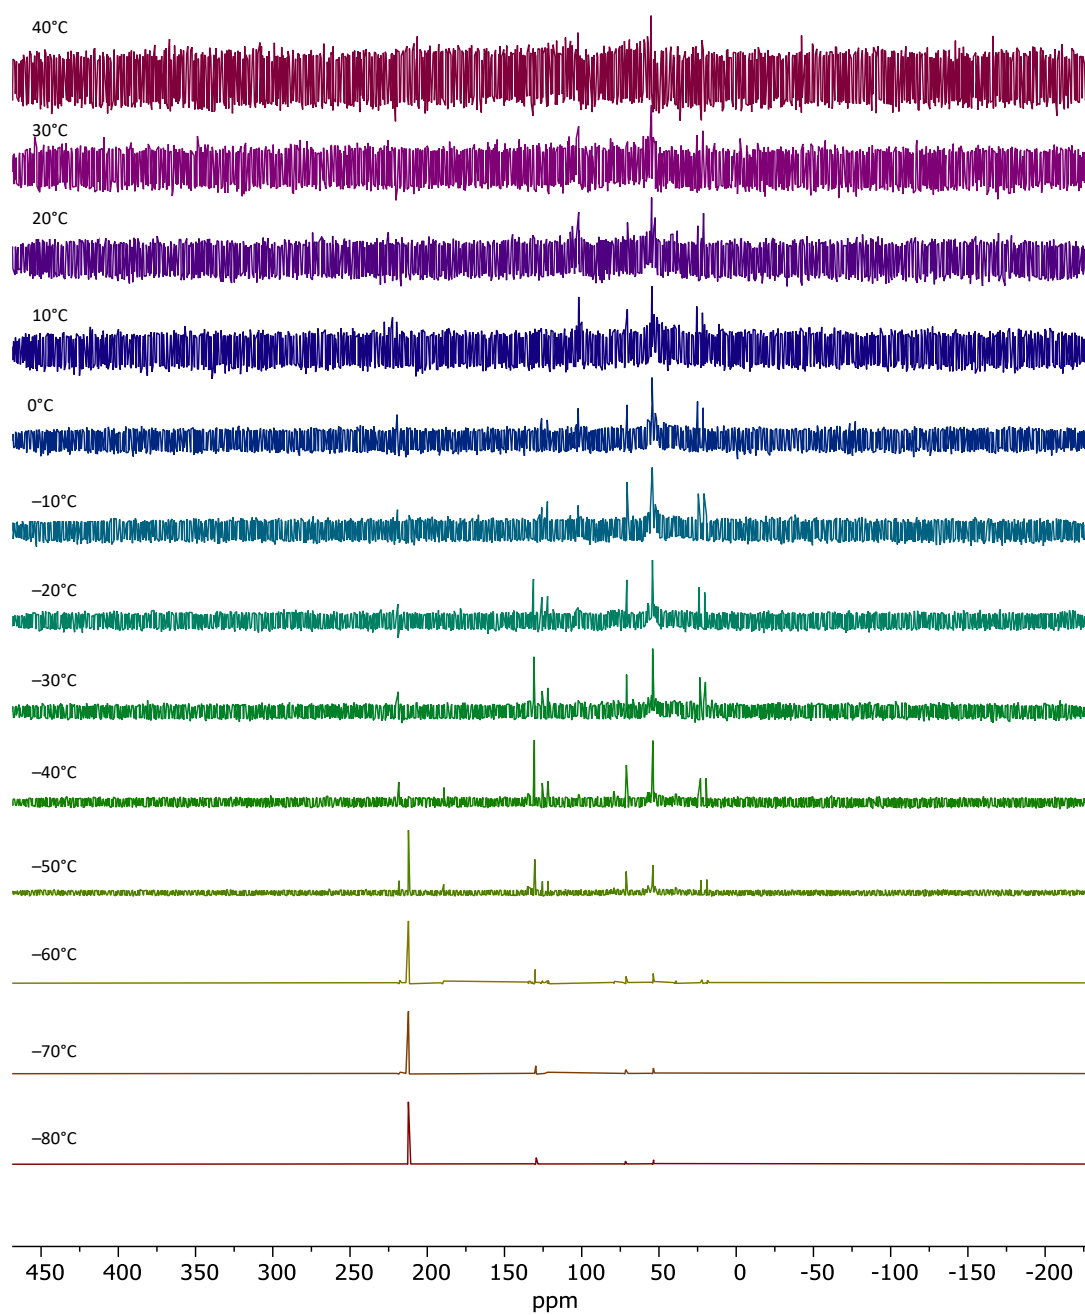

Figure S29:  $^{31}\text{P}\{^1\text{H}\}$ -NMR-VT spectra of the reaction of **6** with MeOTf (**8e**) in DCM,  $-80^\circ\text{C}$  to  $40^\circ\text{C}$ .

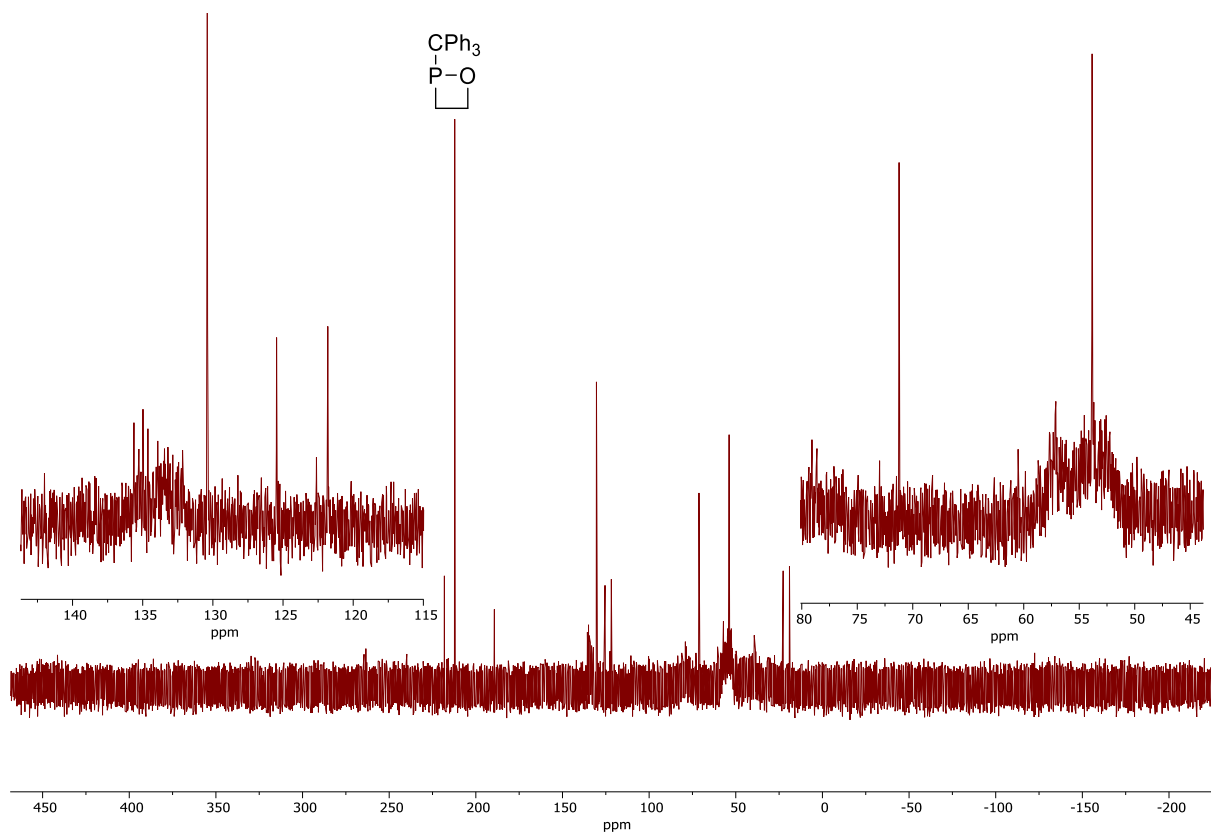

**Figure S30:**  $^{31}\text{P}\{^1\text{H}\}$ -NMR spectrum of the reaction of **6** with MeOTf (**8e**) in DCM, at  $-50^\circ\text{C}$ .

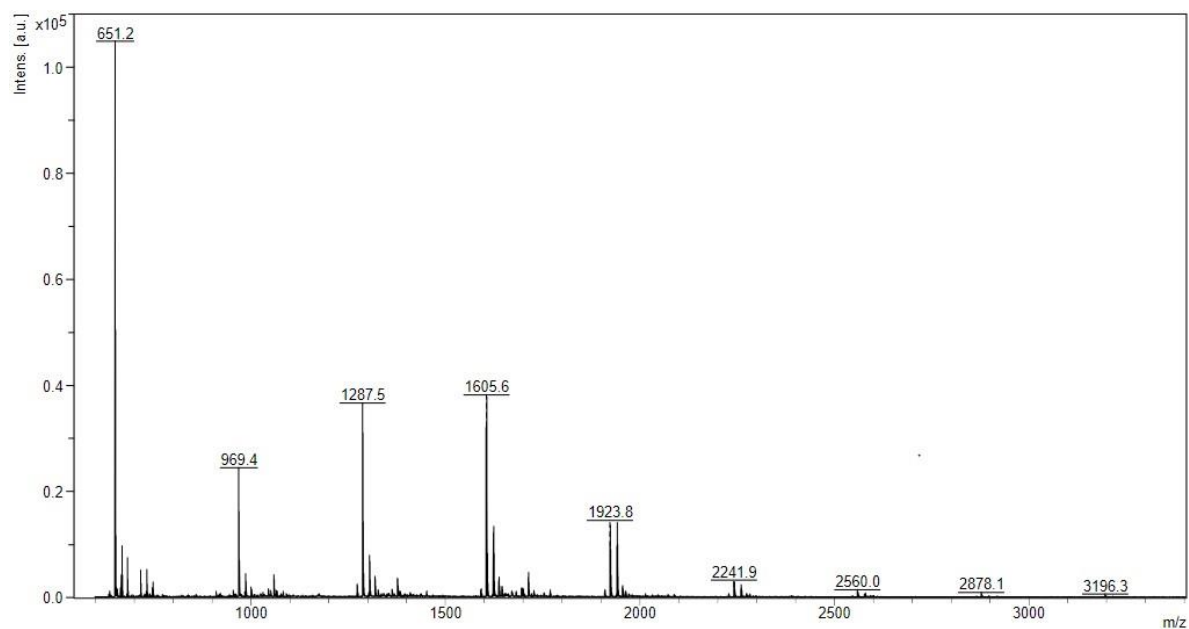

**Figure S31:** MALDI mass-spectrum of oligomers **11** ((2E)-2-Methyl-3-[4-(2-methyl-2-propanyl)phenyl]-2-propen-1-ylidene)malononitrile as matrix).

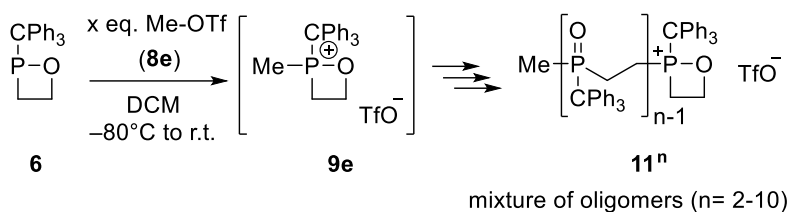

**Equivalent dependency of oligomers 11:** In five Schlenk-tubes, 79.6 mg **6** (0.25 mmol, 1 eq) was dissolved in 1 mL DCM, the solution was cooled to  $-80^\circ\text{C}$ . To each Schlenk-tube, a different amount of methyl triflate solution (0.86 M in DCM) (**8e**) was added as following: a) 0.29 mL (0.25 mmol, 1 eq), b) 0.14 mL (0.12 mmol, 0.5 eq), c) 0.07 mL (0.06 mmol, 0.25 eq), d) 0.05 mL (0.01 mmol, 0.05 eq). After warming up to ambient temperature and evaporation of all volatile components in vacuo (0.02 mbar), the crude products were washed with  $\text{Et}_2\text{O}$  (three times 5 mL) at ambient temperature. The oligomers of **11**<sup>n</sup> were obtained as pale-yellow solid.

**Table S1:** Absolute intensity of oligomers of **11** measured with MALDI MS, in a.u.·10<sup>4</sup>.

| m/z    | n  | a     | b     | c     | d     |
|--------|----|-------|-------|-------|-------|
| /      | 1  | 0.000 | 0.000 | 0.000 | 0.000 |
| 651.3  | 2  | 0.276 | 1.386 | 0.162 | 0.102 |
| 969.4  | 3  | 0.124 | 0.494 | 0.117 | 0.019 |
| 1287.5 | 4  | 0,600 | 0,446 | 0,243 | 0,093 |
| 1605.6 | 5  | 1.200 | 0.699 | 1.036 | 1.074 |
| 1924.7 | 6  | 0.324 | 0.096 | 0.378 | 0.463 |
| 2242.9 | 7  | 0.190 | 0.060 | 0.297 | 0.361 |
| 2561.0 | 8  | 0.029 | 0.000 | 0.081 | 0.111 |
| 2880.1 | 9  | 0,010 | 0,000 | 0,009 | 0.028 |
| 3198.3 | 10 | 0.000 | 0.000 | 0.005 | 0.005 |

**Table S2:** Relative intensity of oligomers of **11** measured with MALDI MS, normalized to the base peak and in %.

| m/z    | n  | a     | b     | c     | d     |
|--------|----|-------|-------|-------|-------|
| /      | 1  | 0.0   | 0.0   | 0.0   | 0.0   |
| 651.3  | 2  | 23.0  | 100.0 | 15.7  | 9.5   |
| 969.4  | 3  | 10.3  | 35.7  | 11.3  | 1.7   |
| 1287.5 | 4  | 50.0  | 32.2  | 23.5  | 8.6   |
| 1605.6 | 5  | 100.0 | 50.4  | 100.0 | 100.0 |
| 1923.7 | 6  | 27.0  | 7.0   | 36.5  | 43.1  |
| 2241.9 | 7  | 15.9  | 4.3   | 28.7  | 33.6  |
| 2560.0 | 8  | 2.4   | 0.0   | 7.8   | 10.3  |
| 2878.1 | 9  | 0.8   | 0.0   | 0.9   | 2.6   |
| 3196.3 | 10 | 0.0   | 0.0   | 0.4   | 0.4   |



## X-ray crystallographic analyses of **4**, **5**, **6**, **10a**, **10b** and **10c**:

Suitable single crystals were obtained from concentrated *n*-pentane (**4**, **5**, **6**, **10a**, **10b** and **10c**) solutions upon slow evaporation at ambient temperature. Data were collected on a Bruker X8-KappaApexII diffractometer equipped with a low-temperature device (Oxford Cryostream 800 series) at 100 K using graphite monochromated Mo-K $\alpha$  radiation ( $\lambda = 0.71073$  Å) (**4**, **5**, **10a**, **10b**), a STOE IPDS-2T diffractometer equipped with a low-temperature device (Oxford-Cryostream 700 series) at 123 K using graphite monochromated Mo-K $\alpha$  radiation ( $\lambda = 0.71073$  Å) (**6**), or a STOE Stadivari diffractometer equipped with a low-temperature device (Oxford-Cryostream 900 series) at 100 K using graphite monochromated Cu-K $\alpha$  radiation ( $\lambda = 1.54186$  Å) (**10c**). The structures were solved by Patterson methods (SHELXS-971) and refined by fullmatrix least squares on F<sup>2</sup> (SHELXL-97,1 SHELXL-20152 or OLEX23). All iso-non-hydrogens were refined anisotropically. The hydrogen atoms were included isotropically using the riding model on the bound atoms. Absorption corrections were carried out empirical (min./max. transmissions = 0.5120/0.7461 (**4**), 0.599645/0.745985 (**5**), 0.8198/0.9942 (**6**), 0.6550/0.7460 (**10a**) 0.487803/0.746069 (**10b**), 0.2209/0.2978 (**10c**)). Crystallographic data for the structures reported in this paper have been deposited in the Cambridge Crystallographic Data Centre as supplementary publication no. CCDC 2290099 (**4**) CCDC 2290100 (**5**), CCDC 2290101 (**6**), CCDC 2290102 (**10a**), CCDC 2290103 (**10b**), CCDC 2290104 (**10c**). The data can be obtained free of charge from the Cambridge Crystallographic Data Centre via [www.ccdc.cam.ac.uk/structures](http://www.ccdc.cam.ac.uk/structures)

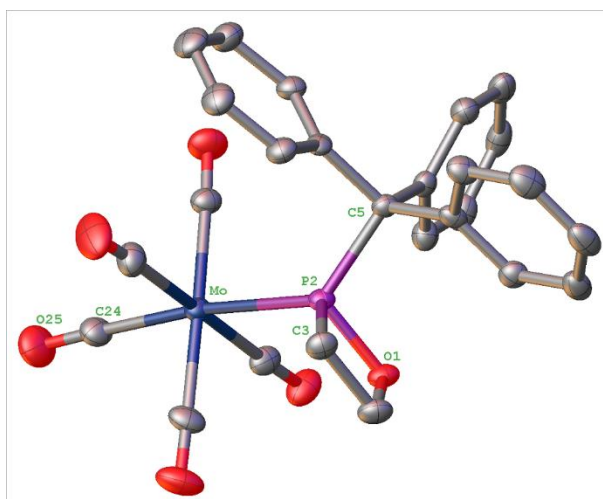

Crystal structure data of **4** (C<sub>26</sub>H<sub>19</sub>O<sub>6</sub>PMo): crystal size 0.21 × 0.03 × 0.02 mm, monoclinic, P2<sub>1</sub>/c, a = 9.4364(12), b = 30.672(4), c = 24.941(3) Å,  $\alpha = 90^\circ$ ,  $\beta = 94.189(5)^\circ$ ,  $\gamma = 90^\circ$ , V = 7199.5(15) Å<sup>3</sup>, Z = 12,  $\rho_{\text{calc}} = 1.534$  g cm<sup>-3</sup>,  $2\theta_{\text{max}} = 56^\circ$ , collected (independent) reflections = 115774 (6495),  $R_{\text{int}} = 0.1230$ ,  $\mu = 0.653$  mm<sup>-1</sup>, 919 refined parameters, 846 restraints,  $R_1$  (for  $I \geq 2\sigma(I)$ ) = 0.0689,  $wR_2$  (for all data) = 0.1627, max./min. residual electron density = 1.41/−1.17 e · Å<sup>-3</sup>.

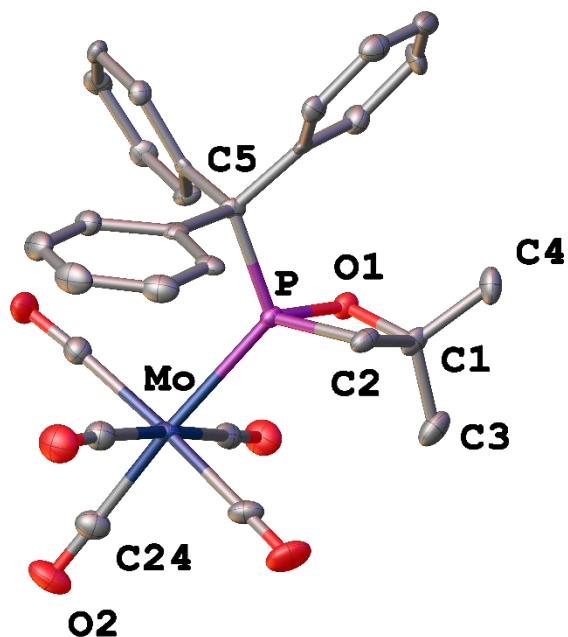

Crystal structure data of **5** ( $C_{28}H_{23}O_6PMo$ ): crystal size  $0.6 \times 0.01 \times 0.01$  mm, triclinic,  $P\bar{1}$ ,  $a = 9.4957(6)$ ,  $b = 18.3164(14)$ ,  $c = 22.5419(16)$  Å,  $\alpha = 99.296(2)$ ,  $\beta = 92.701(2)$ ,  $\gamma = 95.011(2)^\circ$ ,  $V = 3846.9(5)$  Å<sup>3</sup>,  $Z = 6$ ,  $\rho_{\text{calc}} = 1.508$  g cm<sup>-3</sup>,  $2\theta_{\text{max}} = 55.998^\circ$ , collected (independent) reflections = 17274 (17274),  $R_{\text{int}} = 0.1156$ ,  $\mu = 0.615$  mm<sup>-1</sup>, 979 refined parameters, 30 restraints,  $R_1$  (for  $I \geq 2\sigma(I)$ ) = 0.0650,  $wR_2$  (for all data) = 0.1588, max./min. residual electron density = 2.23/−0.83 e · Å<sup>-3</sup>.

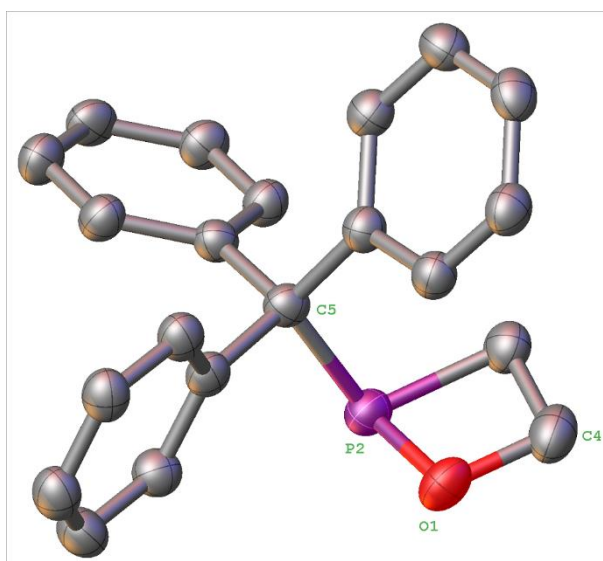

Crystal structure data of **6** ( $C_{21}H_{19}OP$ ): crystal size  $0.25 \times 0.14 \times 0.03$  mm, triclinic,  $P\bar{1}$ ,  $a = 8.1143(10)$ ,  $b = 8.9827(13)$ ,  $c = 12.4136(16)$  Å,  $\alpha = 94.652(11)$ ,  $\beta = 90.566(10)$ ,  $\gamma = 113.742(10)$ ,  $V = 824.6(2)$  Å<sup>3</sup>,  $Z = 2$ ,  $\rho_{\text{calc}} = 1.282$  g cm<sup>-3</sup>,  $2\theta_{\text{max}} = 50.496^\circ$ , collected (independent) reflections = 7553 (7553),  $R_{\text{int}} = 0.0757$ ,  $\mu = 0.169$  mm<sup>-1</sup>, 209 refined parameters, 0 restraints,  $R_1$  (for  $I \geq 2\sigma(I)$ ) = 0.0611,  $wR_2$  (for all data) = 0.1720, max./min. residual electron density = 0.67/−0.41 e · Å<sup>-3</sup>.

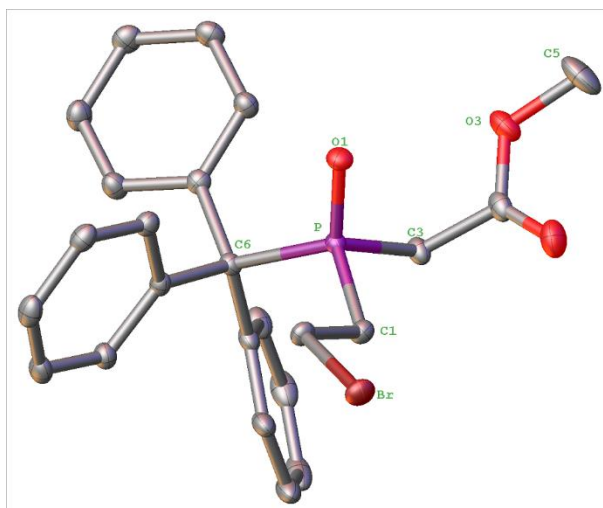

Crystal structure data of **10a** ( $C_{24}H_{24}BrO_3P$ ): crystal size  $0.48 \times 0.32 \times 0.04$  mm, triclinic,  $P\bar{1}$ ,  $a = 9.5566(7)$ ,  $b = 10.8740(7)$ ,  $c = 12.1513(8)$  Å,  $\alpha = 97.716(3)$ ,  $\beta = 112.057(3)$ ,  $\gamma = 109.430(3)$ ,  $V = 1054.03(13)$  Å<sup>3</sup>,  $Z = 2$ ,  $\rho_{\text{calc}} = 1.485$  g cm<sup>-3</sup>,  $2\theta_{\text{max}} = 60.054^\circ$ , collected (independent) reflections = 45848 (6159),  $R_{\text{int}} = 0.0504$ ,  $\mu = 2.049$  mm<sup>-1</sup>, 263 refined parameters, 0 restraints,  $R_1$  (for  $I \geq 2\sigma(I)$ ) = 0.0259,  $wR_2$  (for all data) = 0.0661, max./min. residual electron density = 0.50/−0.46 e · Å<sup>-3</sup>.

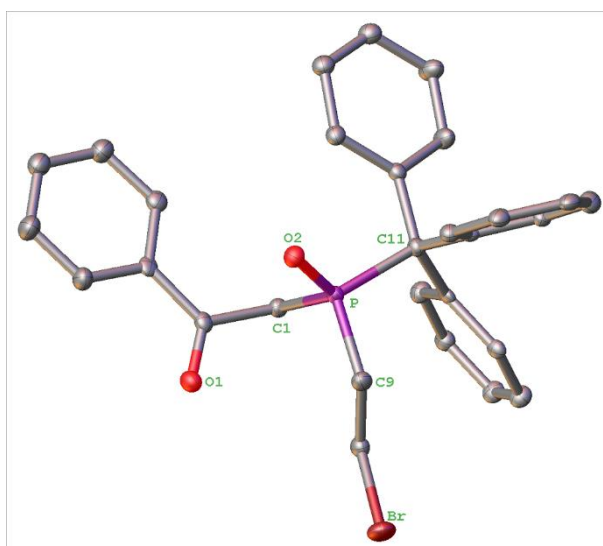

Crystal structure data of **10b** ( $C_{29}H_{26}O_2PBr$ ): crystal size  $0.28 \times 0.14 \times 0.06$  mm, triclinic,  $P\bar{1}$ ,  $a = 8.9276(15)$ ,  $b = 10.5777(17)$ ,  $c = 14.307(2)$  Å,  $\alpha = 69.469(6)$ ,  $\beta = 84.259(7)$ ,  $\gamma = 72.909(7)$ ,  $V = 1209.4(3)$  Å<sup>3</sup>,  $Z = 2$ ,  $\rho_{\text{calc}} = 1.421$  g cm<sup>-3</sup>,  $2\theta_{\text{max}} = 51.996^\circ$ , collected (independent) reflections = 4735 (4735),  $R_{\text{int}} = 0.1078$ ,  $\mu = 1.790$  mm<sup>-1</sup>, 299 refined parameters, 264 restraints,  $R_1$  (for  $I \geq 2\sigma(I)$ ) = 0.0874,  $wR_2$  (for all data) = 0.2394, max./min. residual electron density = 1.48/−1.04 e · Å<sup>-3</sup>.

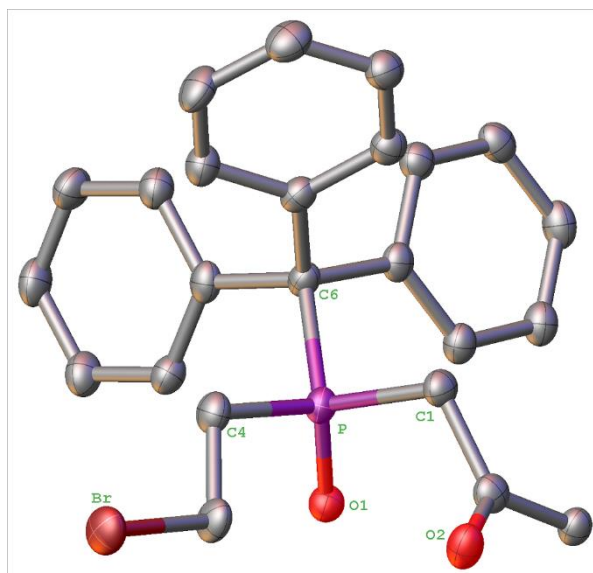

Crystal structure data of **10c** ( $C_{24}H_{24}BrO_2P$ ): crystal size 0.21 × 0.2 × 0.12 mm, triclinic,  $P\bar{1}$ ,  $a = 8.8789(4)$ ,  $b = 9.5863(4)$ ,  $c = 13.4826(5)$  Å,  $\alpha = 84.831(3)$ ,  $\beta = 87.383(3)$ ,  $\gamma = 65.062(3)$ ,  $V = 1036.32(8)$  Å<sup>3</sup>,  $Z = 2$ ,  $\rho_{\text{calc}} = 1.459$  g cm<sup>-3</sup>,  $2\theta_{\text{max}} = 140.976^\circ$ , collected (independent) reflections = 15691 (3862),  $R_{\text{int}} = 0.0486$ ,  $\mu = 3.563$  mm<sup>-1</sup>, 254 refined parameters, 0 restraints,  $R_1$  (for  $I \geq 2\sigma(I)$ ) = 0.0541,  $wR_2$  (for all data) = 0.1529, max./min. residual electron density = 1.70/−0.71 e · Å<sup>-3</sup>.

## THEORETICAL INVESTIGATIONS

### COMPUTATIONAL DETAILS

Quantum chemical calculations were performed with ORCA (v. 4.2.1).<sup>1</sup> All geometry optimizations were run in redundant internal coordinates with tight convergence criteria, also computed using Grimme's fast PBEh-3c composite approach.<sup>2</sup> In all optimizations and energy evaluations, the 2010 Grimme's semiempirical atom-pair-wise correction (DFT-D3 methods), taking into account the major part of the contribution of dispersion forces to the energy, was included.<sup>3</sup> Harmonic frequency calculations verified the nature of the computed species as minima or TS (transition state) structures, featuring none or only one negative eigenvalues, respectively. Moreover, all TS structures were confirmed by intrinsic reaction coordinate (IRC) calculations. From these geometries, all reported electronic data were corrected for the Gibbs energy term at the optimization level and obtained by means of single-point (SP) calculations using the double-hybrid-meta-GGA functional PWPB95<sup>4</sup> with Grimme's D3 correction (PWPB95-D3) as well as the more polarized Ahlrichs' segmented def2-QZVPP<sup>5</sup> basis set.<sup>6</sup> The frontier molecular orbitals (FMOs) energies and isosurfaces (Figure S32) were obtained at the same PWPB95-D3/def2-QZVPP level. AIM wavefunction analyses were performed with the B3LYP<sup>7</sup> functional and the def2-TZVPP<sup>6</sup> basis set and using Multiwfn 3.7.<sup>8</sup> Solvent effects (tetrahydrofuran or dichloromethane) were included using the Conductor-like Polarizable Continuum Model (CPCM).<sup>9</sup> Isotropic values ( $\sigma_{\text{iso}}$ ) for the <sup>31</sup>P NMR magnetic shielding tensor were computed using the Gauge Including Atomic Orbital (GIAO) method,<sup>10</sup> using the PBE0<sup>11</sup> functional and the def2-TZVP basis set.<sup>5</sup> The expected chemical shifts  $\delta^{\text{P}}$  were estimated through a linear equation  $\delta^{\text{P}} = 289.6928 - 0.9817 \cdot \sigma_{\text{iso}}$ , which in turn was obtained from a linear regression ( $R^2 = 0.982$ ) of nineteen reference compounds spanning a wide range of chemical shifts, from  $\delta^{\text{P}} -525.0$  (P<sub>4</sub>) to 598.6 ppm (Tsi-P=P-Tsi, Tsi referring to the trisyl (or tris(trimethylsilyl)methyl) substituent), as reported elsewhere.<sup>12,13,14</sup>

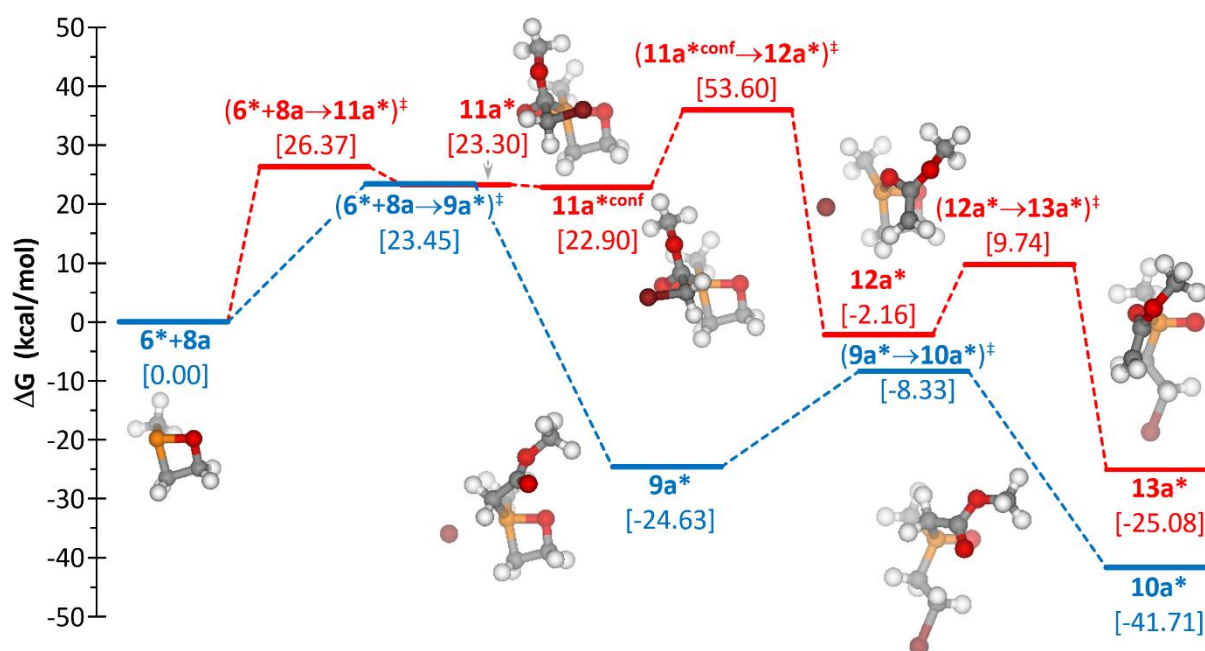

**Figure S31:** Computed (CPCM<sub>THF</sub>/PWPB95-D3/def2-QZVPP//CPCM<sub>THF</sub>/PBEh-3c) Gibbs energy profile for the reaction of model 6\* with 8a, showing the competitive Arbuzov (blue) and Perkow (red) pathways.

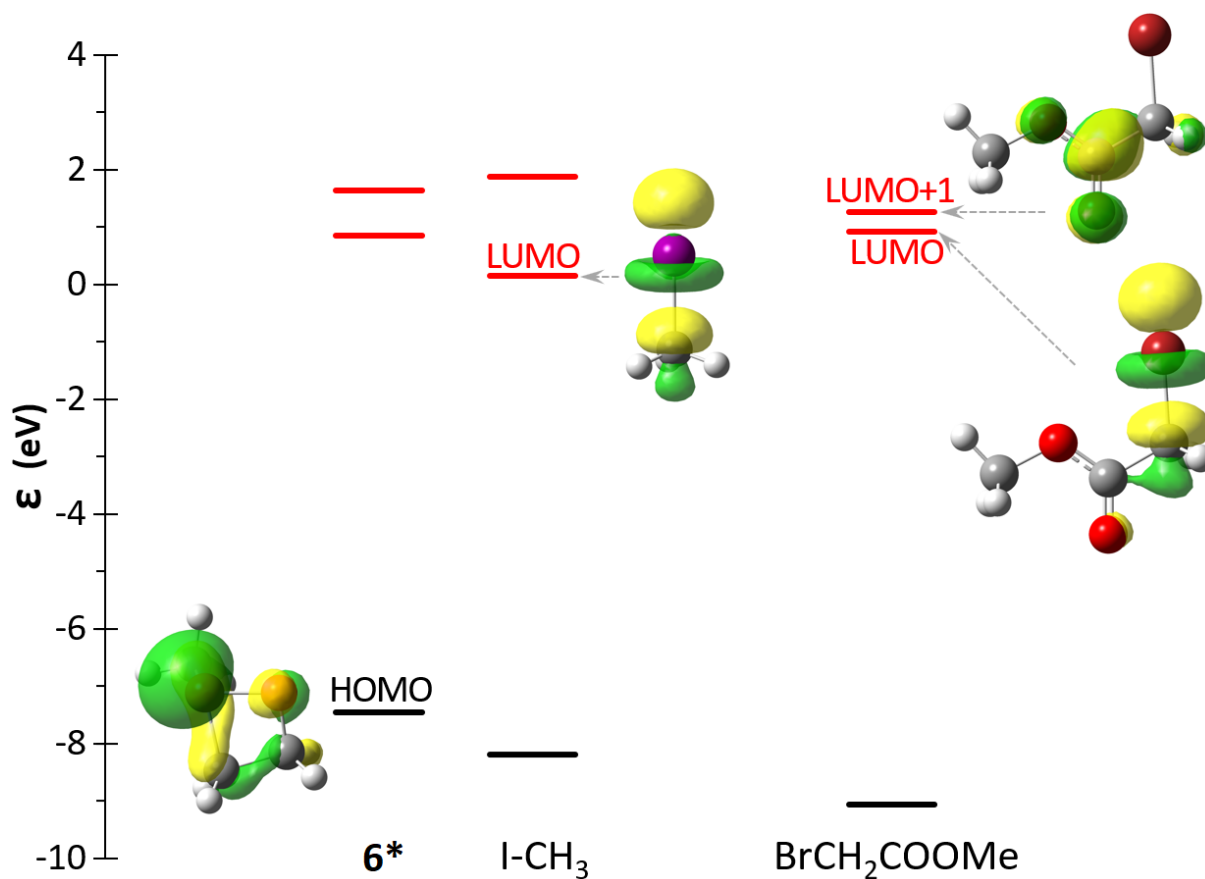

Figure S32: Computed (CPCM<sub>THF</sub>/PWPB95-D3/def2-QZVPP//CPCM<sub>THF</sub>/PBEh-3c) frontier molecular orbitals (FMO) for model **6\*** and reagents **8d** and **8a**.

## COMPUTED STRUCTURES

Cartesian coordinates (in Å) and energies (in hartrees) for all computed species. Geometries, zero-point energy correction ( $ZPE$ ) and Gibbs energy correction ( $G_{corr}$ ) at the CPCM(solvent)/PBEh-3c optimization level, whereas electronic energies are computed at the CPCM(solvent)/PWPB95-D3/def2-QZVPP. Solvent indicated in square brackets (DCM stands for dichloromethane).

**6\*** [THF]

$E = -535.031653056443$  au

$ZPE = 0.10053082$  au

$G_{corr} = 0.07139436$  au

|   |           |           |           |
|---|-----------|-----------|-----------|
| P | -1.162301 | 0.217324  | -0.586062 |
| O | 0.321009  | 0.001337  | 0.205569  |
| C | -0.149104 | -1.036716 | 1.082320  |
| C | -1.651437 | -0.955362 | 0.770680  |
| H | 0.288334  | -2.003763 | 0.818823  |
| H | 0.112024  | -0.815084 | 2.119310  |

|   |           |           |           |
|---|-----------|-----------|-----------|
| H | -2.241879 | -0.486191 | 1.556064  |
| H | -2.129277 | -1.884713 | 0.466577  |
| C | -1.035454 | -0.953067 | -1.999517 |
| H | -2.033736 | -1.084948 | -2.422424 |
| H | -0.404487 | -0.526396 | -2.779776 |
| H | -0.643925 | -1.932386 | -1.721063 |

**6\*** [DCM]

$E = -535.031928780763$  au

$ZPE = 0.10051930$  au

$G_{corr} = 0.07137953$  au

|   |           |          |           |
|---|-----------|----------|-----------|
| P | -1.162332 | 0.216810 | -0.586383 |
| O | 0.321004  | 0.001668 | 0.205910  |

|   |           |           |          |
|---|-----------|-----------|----------|
| C | -0.149336 | -1.036855 | 1.082609 |
| C | -1.651339 | -0.955269 | 0.770787 |

|   |           |           |          |   |           |           |           |
|---|-----------|-----------|----------|---|-----------|-----------|-----------|
| H | 0.288154  | -2.003728 | 0.818785 | C | -1.035258 | -0.953177 | -1.999790 |
| H | 0.111952  | -0.815323 | 2.119557 | H | -2.033828 | -1.084850 | -2.422025 |
| H | -2.241779 | -0.485860 | 1.556012 | H | -0.404733 | -0.526202 | -2.780241 |
| H | -2.128982 | -1.884691 | 0.466676 | H | -0.643755 | -1.932489 | -1.721395 |

ICH<sub>3</sub> (**8d**) [THF]

$E = -337.510362601951$  au  
 $ZPE = 0.03770097$  au  
 $G_{\text{corr}} = 0.01195708$  au

|   |           |           |           |
|---|-----------|-----------|-----------|
| C | 0.012178  | -0.021118 | 0.008568  |
| H | -0.002114 | 0.003740  | 1.092911  |
| H | 1.029790  | 0.003635  | -0.366261 |

|   |           |           |           |
|---|-----------|-----------|-----------|
| H | -0.518067 | -0.889985 | -0.366326 |
| I | -1.007333 | 1.744720  | -0.712225 |

TS(**6\***+**8d**→**9d\***) [THF]

$E = -872.519466231734$  au  
 $ZPE = 0.13849376$  au  
 $G_{\text{corr}} = 0.10083152$  au  
 $\nu = -467.71$  cm<sup>-1</sup>

|   |           |           |           |
|---|-----------|-----------|-----------|
| P | 0.089474  | 0.138196  | -0.011575 |
| O | 0.148806  | -0.160143 | 1.631611  |
| C | 1.593536  | -0.134619 | 1.706339  |
| C | 1.912249  | -0.013524 | 0.205698  |
| H | 1.932881  | 0.724145  | 2.288198  |
| H | 1.966353  | -1.047339 | 2.171701  |
| H | 2.334773  | -0.912874 | -0.237450 |
| H | 2.501816  | 0.851757  | -0.089604 |
| C | -0.220173 | 1.927212  | -0.170211 |

|   |           |           |           |
|---|-----------|-----------|-----------|
| H | -0.038966 | 2.214929  | -1.207216 |
| H | -1.263159 | 2.144368  | 0.059520  |
| H | 0.424118  | 2.518978  | 0.480482  |
| C | -1.365615 | -1.434322 | -1.388461 |
| H | -0.808017 | -1.098203 | -2.244512 |
| H | -2.207983 | -0.860509 | -1.045047 |
| H | -0.970444 | -2.220873 | -0.770511 |
| I | -2.828555 | -3.044710 | -2.775680 |

**9d\*** [THF]

$E = -872.601819387622$  au  
 $ZPE = 0.14106686$  au  
 $G_{\text{corr}} = 0.10391565$  au

|   |           |           |           |
|---|-----------|-----------|-----------|
| P | 0.032387  | 0.013077  | -0.179113 |
| O | -0.010362 | 0.003880  | 1.467193  |
| C | 1.433922  | 0.023392  | 1.630635  |
| C | 1.813573  | 0.038026  | 0.140147  |
| H | 1.741485  | 0.915515  | 2.173530  |
| H | 1.766814  | -0.866380 | 2.162347  |
| H | 2.335665  | -0.839979 | -0.230801 |
| H | 2.308610  | 0.936012  | -0.219935 |
| C | -0.846353 | 1.489997  | -0.689865 |

|   |           |           |           |
|---|-----------|-----------|-----------|
| H | -1.180403 | 1.418522  | -1.719506 |
| H | -1.707434 | 1.597734  | -0.027842 |
| H | -0.202207 | 2.360018  | -0.577656 |
| C | -0.800616 | -1.484864 | -0.704940 |
| H | -1.662274 | -1.621472 | -0.048915 |
| H | -0.132360 | -2.336732 | -0.594294 |
| H | -1.130550 | -1.416097 | -1.736076 |
| I | 1.207622  | 0.049490  | -3.277259 |

TS(**9d\***→**10d\***) [THF]

$E = -872.577647086488$  au  
 $ZPE = 0.13882249$  au  
 $G_{\text{corr}} = 0.10222276$  au  
 $\nu = -534.63$  cm<sup>-1</sup>

|   |           |           |           |
|---|-----------|-----------|-----------|
| P | -0.082108 | 0.024474  | 0.128580  |
| O | -0.266473 | 0.028432  | 1.664868  |
| C | 1.695835  | 0.010633  | 1.745301  |
| C | 1.725604  | 0.008589  | 0.231447  |
| H | 1.761457  | 0.934297  | 2.295355  |
| H | 1.744562  | -0.912782 | 2.297525  |
| H | 2.188181  | -0.883478 | -0.183262 |
| H | 2.204024  | 0.891277  | -0.185346 |
| C | -0.721190 | 1.476450  | -0.706724 |

|   |           |           |           |
|---|-----------|-----------|-----------|
| H | -0.453362 | 1.449756  | -1.762741 |
| H | -1.807311 | 1.502701  | -0.619256 |
| H | -0.306323 | 2.376194  | -0.255098 |
| C | -0.745989 | -1.418834 | -0.702341 |
| H | -1.832500 | -1.425630 | -0.615903 |
| H | -0.347563 | -2.324162 | -0.247137 |
| H | -0.476710 | -1.400558 | -1.758156 |
| I | 4.496013  | -0.014890 | 2.021658  |

**10d\*** [THF]

$E = -872.628014152756$  au  
 $ZPE = 0.14017645$  au  
 $G_{\text{corr}} = 0.10366744$  au

|   |           |           |          |
|---|-----------|-----------|----------|
| P | -0.233204 | -0.249851 | 0.351932 |
| O | -0.874521 | -0.561576 | 1.673828 |

|   |          |           |          |
|---|----------|-----------|----------|
| C | 2.149988 | 0.469971  | 1.538650 |
| C | 1.597757 | -0.362317 | 0.406461 |

|   |           |           |           |
|---|-----------|-----------|-----------|
| H | 1.976388  | 1.535379  | 1.406027  |
| H | 1.763823  | 0.158666  | 2.505679  |
| H | 1.846275  | -1.417346 | 0.540237  |
| H | 2.001597  | -0.048775 | -0.558001 |
| C | -0.597336 | 1.415983  | -0.261188 |
| H | -0.085141 | 1.615514  | -1.201808 |
| H | -1.671077 | 1.514079  | -0.420463 |

|   |           |           |           |
|---|-----------|-----------|-----------|
| H | -0.293590 | 2.163829  | 0.470894  |
| C | -0.702555 | -1.368011 | -0.991680 |
| H | -1.778367 | -1.307790 | -1.155576 |
| H | -0.449922 | -2.393121 | -0.722344 |
| H | -0.192511 | -1.111675 | -1.919675 |
| I | 4.318540  | 0.269510  | 1.685798  |

MeOTf (**8e**) [DCM]

$E = -1001.38305070666$  au  
 $ZPE = 0.06903083$  au  
 $G_{\text{corr}} = 0.03534905$  au

|   |           |           |           |
|---|-----------|-----------|-----------|
| S | -0.080340 | 0.027724  | 0.497357  |
| O | -0.368877 | 0.512934  | 1.818532  |
| O | 1.489013  | -0.082857 | 0.376624  |
| O | -0.735801 | -1.125497 | -0.064729 |
| C | -0.396458 | 1.439495  | -0.648405 |
| F | -0.010607 | 1.121202  | -1.872349 |

|   |           |           |           |
|---|-----------|-----------|-----------|
| F | 0.264018  | 2.505160  | -0.239718 |
| F | -1.692681 | 1.690771  | -0.645849 |
| C | 2.094278  | -1.056787 | -0.510089 |
| H | 1.778812  | -0.910745 | -1.540173 |
| H | 3.160517  | -0.876249 | -0.426578 |
| H | 1.863510  | -2.066590 | -0.181813 |

TS(**6\*+8e→9e\***) [DCM]

$E = -1536.396760140005$  au  
 $ZPE = 0.16847222$  au  
 $G_{\text{corr}} = 0.12588955$  au  
 $\nu = -597.47$  cm<sup>-1</sup>

|   |           |           |           |
|---|-----------|-----------|-----------|
| P | 0.697656  | 0.456494  | -0.070665 |
| O | -0.322647 | -0.141273 | 1.109802  |
| C | 0.706812  | -0.229758 | 2.123495  |
| C | 1.927469  | 0.135807  | 1.260427  |
| H | 0.518186  | 0.484863  | 2.926560  |
| H | 0.740186  | -1.234789 | 2.544597  |
| H | 2.594269  | -0.698049 | 1.051030  |
| H | 2.507590  | 0.994098  | 1.592220  |
| C | 0.451929  | 2.261217  | -0.059988 |
| H | 1.253853  | 2.719767  | -0.641118 |
| H | -0.493787 | 2.509882  | -0.541263 |
| H | 0.463977  | 2.675165  | 0.948444  |

|   |           |           |           |
|---|-----------|-----------|-----------|
| C | 0.677968  | -0.733875 | -2.315385 |
| H | -0.304772 | -0.314616 | -2.446672 |
| H | 0.795028  | -1.627048 | -1.726133 |
| H | 1.537705  | -0.122996 | -2.531227 |
| O | 0.582923  | -1.594371 | -3.959612 |
| S | 1.776047  | -2.365809 | -4.478011 |
| O | 1.370595  | -3.469844 | -5.324535 |
| O | 2.790329  | -2.598764 | -3.464741 |
| C | 2.533567  | -1.146091 | -5.630185 |
| F | 2.877115  | -0.043335 | -4.972256 |
| F | 1.679826  | -0.819554 | -6.590068 |
| F | 3.621140  | -1.666971 | -6.182366 |

**9e\*** [DCM]

$E = -1536.49655609224$  au  
 $ZPE = 0.17078668$  au  
 $G_{\text{corr}} = 0.12879185$  au

|   |           |           |           |
|---|-----------|-----------|-----------|
| P | 0.676887  | 0.193290  | -0.590097 |
| O | 0.143080  | 0.140361  | 0.974004  |
| C | 1.352613  | -0.461461 | 1.501229  |
| C | 2.119949  | -0.582427 | 0.177356  |
| H | 1.824678  | 0.200801  | 2.225591  |
| H | 1.128923  | -1.418320 | 1.970382  |
| H | 2.302117  | -1.597719 | -0.166442 |
| H | 3.031625  | 0.004803  | 0.095812  |
| C | 0.676421  | 1.937281  | -1.013117 |
| H | 0.652713  | 2.095483  | -2.086063 |
| H | -0.210403 | 2.380112  | -0.559362 |
| H | 1.559219  | 2.417293  | -0.593923 |

|   |           |           |           |
|---|-----------|-----------|-----------|
| C | -0.535282 | -0.743504 | -1.523220 |
| H | -0.541892 | -0.460383 | -2.569981 |
| H | -1.510363 | -0.533687 | -1.083754 |
| H | -0.328925 | -1.807853 | -1.434344 |
| O | 2.097215  | -2.378528 | -2.697276 |
| S | 2.643797  | -1.113281 | -3.176029 |
| O | 4.091612  | -1.022077 | -3.279676 |
| O | 2.013891  | 0.087181  | -2.562772 |
| C | 2.059180  | -0.996653 | -4.916668 |
| F | 0.730487  | -1.035292 | -4.969910 |
| F | 2.536632  | -2.012843 | -5.626463 |
| F | 2.468789  | 0.137576  | -5.472927 |

**9e** [DCM]

$E = -2225.643622725146$  au (CPCM<sub>(CH<sub>2</sub>Cl<sub>2</sub>)/PBEh-3c)</sub>

|   |           |           |           |
|---|-----------|-----------|-----------|
| O | -0.119379 | -0.420316 | 0.401833  |
| P | 0.036583  | 0.104862  | 1.923944  |
| C | 1.791460  | -0.184464 | 1.620241  |
| C | 1.327315  | -0.619915 | 0.216012  |
| H | 2.425535  | 0.698114  | 1.641259  |
| H | 2.215171  | -0.980267 | 2.226743  |
| H | 1.680873  | 0.028544  | -0.582170 |

|   |           |           |           |
|---|-----------|-----------|-----------|
| H | 1.526773  | -1.661897 | -0.014903 |
| C | -0.441214 | 1.874796  | 2.202215  |
| C | -0.210165 | 1.940427  | 3.715900  |
| C | -1.280433 | 1.993256  | 4.607041  |
| C | -1.067128 | 1.918984  | 5.975513  |
| C | 0.216529  | 1.773955  | 6.480655  |
| C | 1.289935  | 1.709727  | 5.605006  |



|   |           |          |          |
|---|-----------|----------|----------|
| C | 1.079439  | 1.791802 | 4.236851 |
| H | -2.293979 | 2.084713 | 4.243172 |
| H | -1.913599 | 1.967890 | 6.647273 |
| H | 0.379041  | 1.710788 | 7.548257 |
| H | 2.297574  | 1.597515 | 5.981630 |
| H | 1.942084  | 1.754258 | 3.584739 |
| C | -1.886492 | 2.168031 | 1.809138 |
| C | -2.763797 | 1.234766 | 1.272545 |
| C | -4.064306 | 1.596635 | 0.934654 |
| C | -4.501289 | 2.894739 | 1.128779 |
| C | -3.627255 | 3.837740 | 1.658611 |
| C | -2.333320 | 3.478536 | 1.989209 |
| H | -2.476542 | 0.208082 | 1.084263 |
| H | -4.728207 | 0.852545 | 0.515687 |
| H | -5.512425 | 3.175116 | 0.865552 |
| H | -3.953695 | 4.857898 | 1.810914 |
| H | -1.662623 | 4.225851 | 2.395162 |
| C | 0.464616  | 2.775363 | 1.358654 |
| C | 1.245952  | 3.782385 | 1.915544 |
| C | 2.008872  | 4.614731 | 1.105575 |

|   |           |           |           |
|---|-----------|-----------|-----------|
| C | 2.003453  | 4.453585  | -0.270371 |
| C | 1.205982  | 3.468043  | -0.836800 |
| C | 0.434951  | 2.645969  | -0.031558 |
| H | 1.259203  | 3.946513  | 2.983483  |
| H | 2.605447  | 5.394186  | 1.560640  |
| H | 2.603050  | 5.098786  | -0.898559 |
| H | 1.171522  | 3.344832  | -1.911073 |
| H | -0.215587 | 1.920683  | -0.502875 |
| C | -0.798562 | -0.968519 | 3.090355  |
| H | -0.748787 | -1.986432 | 2.712256  |
| H | -0.284663 | -0.929769 | 4.049298  |
| H | -1.834568 | -0.668182 | 3.231998  |
| O | 1.773510  | -5.684706 | 1.955492  |
| S | 1.419968  | -4.401765 | 1.355043  |
| O | 2.130023  | -4.070922 | 0.117789  |
| O | 1.285402  | -3.290259 | 2.304906  |
| C | -0.312163 | -4.661867 | 0.785782  |
| F | -1.107683 | -4.960848 | 1.812405  |
| F | -0.379974 | -5.656664 | -0.095283 |
| F | -0.792030 | -3.561090 | 0.204745  |

BrCH<sub>2</sub>COOMe (**8a**) [THF]

$E = -2841.9864028615$  au

$ZPE = 0.08307163$  au

$G_{\text{corr}} = 0.05157759$  au

|   |           |           |           |
|---|-----------|-----------|-----------|
| C | 0.143412  | -0.889387 | -2.472793 |
| H | -0.744978 | -0.332752 | -2.174492 |
| H | 1.015106  | -0.287948 | -2.212615 |
| C | 0.194532  | -2.171924 | -1.676580 |
| O | 0.169918  | -2.133799 | -0.473252 |
| O | 0.272559  | -3.267691 | -2.393980 |

|    |           |           |           |
|----|-----------|-----------|-----------|
| C  | 0.332610  | -4.510274 | -1.688074 |
| H  | 0.393071  | -5.280083 | -2.450732 |
| H  | 1.213999  | -4.558559 | -1.049875 |
| H  | -0.560812 | -4.663730 | -1.084220 |
| Br | 0.107280  | -1.087779 | -4.403166 |

TS(6\*+8a→9a\*) [THF]

$E = -3377.00028865744$  au

$ZPE = 0.18423871$  au

$G_{\text{corr}} = 0.14258079$  au

$\nu = -466.45$  cm<sup>-1</sup>

|   |           |           |           |
|---|-----------|-----------|-----------|
| P | 0.478494  | 0.211896  | -0.495966 |
| O | -0.143681 | -0.742582 | 0.716759  |
| C | 1.003188  | -0.583763 | 1.590771  |
| C | 1.878097  | 0.302950  | 0.686215  |
| H | 0.706029  | -0.099190 | 2.521409  |
| H | 1.443516  | -1.554898 | 1.814607  |
| H | 2.791185  | -0.169159 | 0.331115  |
| H | 2.101796  | 1.294712  | 1.073456  |
| C | -0.411140 | 1.793151  | -0.428079 |
| H | 0.119893  | 2.510087  | -1.056074 |
| H | -1.415501 | 1.669635  | -0.831999 |
| H | -0.471197 | 2.181329  | 0.588639  |

|    |           |           |           |
|----|-----------|-----------|-----------|
| C  | 0.918684  | -0.958507 | -2.671753 |
| H  | -0.014275 | -0.582386 | -3.057259 |
| H  | 1.802177  | -0.345052 | -2.737718 |
| C  | 0.968718  | -2.194664 | -1.842153 |
| O  | 1.950036  | -2.554406 | -1.241035 |
| O  | -0.199724 | -2.806790 | -1.818192 |
| C  | -0.297681 | -3.989816 | -1.026184 |
| H  | -1.324400 | -4.328194 | -1.125326 |
| H  | 0.376076  | -4.766016 | -1.387495 |
| H  | -0.083352 | -3.782376 | 0.021628  |
| Br | 1.434296  | -2.120703 | -4.704287 |

9a\* [THF]

$E = -3377.08090723824$  au

$ZPE = 0.18704027$  au

$G_{\text{corr}} = 0.14657656$  au

|   |           |           |           |
|---|-----------|-----------|-----------|
| P | 0.354978  | -0.102715 | -0.188273 |
| O | 0.753997  | -0.306158 | 1.441650  |
| C | 2.081690  | 0.232712  | 1.331943  |
| C | 2.023099  | 0.624014  | -0.146545 |
| H | 2.216020  | 1.076880  | 2.008463  |
| H | 2.833916  | -0.526271 | 1.549963  |
| H | 2.724739  | 0.128664  | -0.813714 |
| H | 2.014508  | 1.691657  | -0.357809 |
| C | -1.185402 | 0.827675  | -0.047190 |
| H | -1.895300 | 0.530085  | -0.812292 |
| H | -1.601722 | 0.651236  | 0.943457  |

|   |           |           |           |
|---|-----------|-----------|-----------|
| H | -0.970380 | 1.888797  | -0.159955 |
| C | 0.132514  | -1.848035 | -0.681983 |
| H | -0.666601 | -1.911391 | -1.420262 |
| H | 1.054651  | -2.191552 | -1.149296 |
| C | -0.193317 | -2.697405 | 0.522029  |
| O | 0.491384  | -3.591362 | 0.939098  |
| O | -1.351913 | -2.328447 | 1.045578  |
| C | -1.783264 | -2.997733 | 2.231369  |
| H | -2.726948 | -2.536996 | 2.506152  |
| H | -1.936746 | -4.061108 | 2.051868  |
| H | -1.065419 | -2.866706 | 3.040219  |

Br 0.330158 0.481545 -2.788641

TS(9a\*→10a\*) [THF]

$E = -3377.05269757178$  au

$ZPE = 0.18423451$  au

$G_{\text{corr}} = 0.14433535$  au

$\nu = -524.25$  cm<sup>-1</sup>

|   |           |           |           |    |           |           |           |
|---|-----------|-----------|-----------|----|-----------|-----------|-----------|
| P | 0.119502  | 0.273784  | 0.274404  | C  | -0.792739 | -1.268050 | 0.007427  |
| O | 0.131885  | 0.760837  | 1.742547  | H  | -1.862744 | -1.050214 | 0.012119  |
| C | 2.041222  | 0.571197  | 1.651954  | H  | -0.551148 | -1.634232 | -0.996609 |
| C | 1.917170  | 0.129791  | 0.206364  | C  | -0.432091 | -2.325589 | 1.018645  |
| H | 2.245312  | 1.600625  | 1.893629  | O  | 0.638989  | -2.387935 | 1.564768  |
| H | 2.105289  | -0.160251 | 2.439499  | O  | -1.420348 | -3.175751 | 1.205408  |
| H | 2.297403  | -0.870492 | 0.026599  | C  | -1.194611 | -4.259105 | 2.114332  |
| H | 2.378933  | 0.827651  | -0.487892 | H  | -2.115119 | -4.834016 | 2.121990  |
| C | -0.549232 | 1.437192  | -0.911506 | H  | -0.372650 | -4.889980 | 1.778834  |
| H | -0.432611 | 1.049187  | -1.923294 | H  | -0.984161 | -3.892548 | 3.118011  |
| H | -1.608036 | 1.602483  | -0.714144 | Br | 4.687272  | 0.377517  | 1.616415  |
| H | -0.019634 | 2.385095  | -0.830183 |    |           |           |           |

10a\* [THF]

$E = -3377.10617986855$  au

$ZPE = 0.18598751$  au

$G_{\text{corr}} = 0.14462710$  au

|   |           |           |           |    |           |           |           |
|---|-----------|-----------|-----------|----|-----------|-----------|-----------|
| P | 0.009962  | 0.202913  | 0.437851  | C  | -0.093214 | -1.517052 | -0.218564 |
| O | -0.574310 | 0.312934  | 1.814276  | H  | -1.002001 | -1.591476 | -0.816913 |
| C | 2.607744  | -0.015274 | 1.395400  | H  | 0.760747  | -1.721797 | -0.865233 |
| C | 1.771634  | 0.687967  | 0.350214  | C  | -0.119554 | -2.487961 | 0.927458  |
| H | 2.235322  | 0.169788  | 2.400892  | O  | 0.863486  | -2.900897 | 1.489335  |
| H | 2.662803  | -1.088713 | 1.230413  | O  | -1.354890 | -2.814514 | 1.262523  |
| H | 2.140213  | 0.490955  | -0.658621 | C  | -1.522562 | -3.676624 | 2.388838  |
| H | 1.791840  | 1.770100  | 0.502586  | H  | -2.594187 | -3.801986 | 2.509516  |
| C | -0.785465 | 1.213510  | -0.829327 | H  | -1.060486 | -4.648369 | 2.217831  |
| H | -0.329132 | 1.052033  | -1.805607 | H  | -1.105168 | -3.232917 | 3.292042  |
| H | -1.842504 | 0.955603  | -0.887110 | Br | 4.463189  | 0.641713  | 1.358987  |
| H | -0.695615 | 2.267262  | -0.567472 |    |           |           |           |

TS(6\*+8a→11a\*) [THF]

$E = -3376.998785548004$  au

$ZPE = 0.18506365$  au

$G_{\text{corr}} = 0.14572130$  au

$\nu = -134.51$  cm<sup>-1</sup>

|   |           |           |           |    |           |           |           |
|---|-----------|-----------|-----------|----|-----------|-----------|-----------|
| P | 0.309619  | -0.489487 | -0.162375 | C  | 1.332870  | -2.778407 | -1.504238 |
| O | 0.557177  | -0.603774 | 1.485131  | H  | 1.290497  | -3.418652 | -2.387635 |
| C | 1.885874  | -0.036631 | 1.440365  | H  | 2.286793  | -2.256330 | -1.502503 |
| C | 1.978849  | 0.218608  | -0.074782 | C  | 0.161549  | -1.795818 | -1.548710 |
| H | 1.933913  | 0.871826  | 2.040886  | O  | 0.301732  | -0.817628 | -2.390575 |
| H | 2.621757  | -0.752009 | 1.807657  | O  | -0.984832 | -2.570282 | -1.569842 |
| H | 2.755724  | -0.335181 | -0.595450 | C  | -2.216833 | -1.922641 | -1.797983 |
| H | 2.030439  | 1.264390  | -0.371245 | H  | -2.939700 | -2.698963 | -2.041276 |
| C | -0.976672 | 0.775186  | -0.316654 | H  | -2.573923 | -1.399930 | -0.905095 |
| H | -1.314016 | 0.892136  | -1.340243 | H  | -2.171927 | -1.214656 | -2.626553 |
| H | -1.816626 | 0.506850  | 0.322529  | Br | 1.295532  | -3.927366 | 0.076109  |
| H | -0.570698 | 1.722989  | 0.037438  |    |           |           |           |

11a\* [THF]

$E = -3377.00513186601$  au

$ZPE = 0.18640312$  au

$G_{\text{corr}} = 0.14717668$  au

|   |          |           |           |   |          |           |           |
|---|----------|-----------|-----------|---|----------|-----------|-----------|
| P | 0.352435 | -0.393091 | -0.440524 | H | 1.775602 | 0.806341  | 2.031798  |
| O | 0.451029 | -0.615577 | 1.255686  | H | 2.465041 | -0.810415 | 1.787517  |
| C | 1.766731 | -0.073459 | 1.384653  | H | 2.831864 | -0.286695 | -0.567105 |
| C | 2.018430 | 0.256405  | -0.089560 | H | 2.119534 | 1.313688  | -0.334586 |

|   |           |           |           |    |           |           |           |
|---|-----------|-----------|-----------|----|-----------|-----------|-----------|
| C | -0.987550 | 0.826746  | -0.458165 | O  | 0.443334  | -0.696473 | -2.210214 |
| H | -1.345372 | 1.041439  | -1.459608 | O  | -0.937854 | -2.568373 | -1.740681 |
| H | -1.811501 | 0.500537  | 0.172692  | C  | -2.191845 | -1.934753 | -1.624659 |
| H | -0.587124 | 1.743178  | -0.021781 | H  | -2.938537 | -2.658031 | -1.945116 |
| C | 1.356054  | -2.825413 | -1.490601 | H  | -2.410802 | -1.657391 | -0.589217 |
| H | 1.365068  | -3.362973 | -2.441189 | H  | -2.276932 | -1.049879 | -2.258582 |
| H | 2.313095  | -2.323324 | -1.368589 | Br | 1.211441  | -4.146378 | -0.058991 |
| C | 0.194958  | -1.851878 | -1.458222 |    |           |           |           |

**11a\*<sup>conf</sup>** [THF]

$E = -3377.00570863094$  au  
 $ZPE = 0.18645678$  au  
 $G_{\text{corr}} = 0.14711711$  au

|   |           |           |           |    |           |           |           |
|---|-----------|-----------|-----------|----|-----------|-----------|-----------|
| P | -0.006852 | -0.068110 | 0.030054  | C  | 0.066614  | -2.788699 | -0.679000 |
| O | 0.176819  | -0.191341 | 1.733166  | H  | 1.118246  | -2.628551 | -0.448997 |
| C | 1.588319  | 0.036323  | 1.728919  | H  | -0.367009 | -3.435782 | 0.081825  |
| C | 1.797368  | 0.115478  | 0.214213  | C  | -0.700077 | -1.496159 | -0.803829 |
| H | 1.847146  | 0.963415  | 2.245594  | O  | -0.151258 | -0.551617 | -1.676791 |
| H | 2.126855  | -0.787678 | 2.201988  | O  | -2.022198 | -1.822107 | -0.962353 |
| H | 2.377380  | -0.695225 | -0.224141 | C  | -2.973257 | -0.790346 | -1.107077 |
| H | 2.175111  | 1.059710  | -0.177622 | H  | -3.914960 | -1.271648 | -1.361923 |
| C | -0.932578 | 1.488348  | -0.020122 | H  | -3.117018 | -0.235231 | -0.175892 |
| H | -1.282629 | 1.733942  | -1.017460 | H  | -2.717493 | -0.090825 | -1.904403 |
| H | -1.769935 | 1.457207  | 0.673597  | Br | 0.019673  | -3.764272 | -2.383704 |
| H | -0.256690 | 2.274250  | 0.320797  |    |           |           |           |

**TS(11a\*<sup>conf</sup>→12a\*)** [THF]

$E = -3376.95462757399$  au  
 $ZPE = 0.18380093$  au  
 $G_{\text{corr}} = 0.14495759$  au  
 $\nu = -529.94$  cm<sup>-1</sup>

|   |           |           |           |    |           |           |           |
|---|-----------|-----------|-----------|----|-----------|-----------|-----------|
| P | 0.392314  | -0.245865 | -0.631625 | C  | 1.262746  | -2.784009 | -1.819960 |
| O | 0.254874  | -0.873367 | 0.900625  | H  | 1.087399  | -3.839523 | -1.952746 |
| C | 1.480703  | -0.253081 | 1.369304  | H  | 2.244516  | -2.413720 | -2.072472 |
| C | 2.005758  | 0.234734  | 0.012824  | C  | 0.182510  | -1.919368 | -1.815726 |
| H | 1.246035  | 0.561883  | 2.055382  | O  | 0.432567  | -0.555506 | -2.235558 |
| H | 2.114516  | -0.989119 | 1.856484  | O  | -1.026437 | -2.436564 | -2.134746 |
| H | 2.817310  | -0.378495 | -0.377831 | C  | -2.182875 | -1.999344 | -1.445640 |
| H | 2.261099  | 1.288415  | -0.082970 | H  | -2.966963 | -2.724789 | -1.650852 |
| C | -0.841608 | 1.067660  | -0.568304 | H  | -2.023951 | -1.964543 | -0.364049 |
| H | -0.760812 | 1.700315  | -1.449762 | H  | -2.523901 | -1.024705 | -1.801359 |
| H | -1.850591 | 0.663239  | -0.517209 | Br | 2.250514  | -3.543144 | 0.471928  |
| H | -0.678626 | 1.663129  | 0.329214  |    |           |           |           |

**12a\*** [THF]

$E = -3377.04364517711$  au  
 $ZPE = 0.18576513$  au  
 $G_{\text{corr}} = 0.14512079$  au

|   |           |           |           |    |           |           |           |
|---|-----------|-----------|-----------|----|-----------|-----------|-----------|
| P | 0.145113  | -0.113944 | -0.245828 | C  | 0.933395  | -3.202349 | -0.640730 |
| O | 0.331149  | -0.306915 | 1.400919  | H  | 1.237695  | -4.189324 | -0.328566 |
| C | 1.768898  | -0.229693 | 1.407293  | H  | 1.569430  | -2.662133 | -1.325074 |
| C | 1.953586  | 0.033585  | -0.085061 | C  | -0.238448 | -2.715823 | -0.250414 |
| H | 2.109730  | 0.583587  | 2.047132  | O  | -0.682221 | -1.460254 | -0.593833 |
| H | 2.206552  | -1.170161 | 1.741767  | O  | -1.144656 | -3.428488 | 0.409657  |
| H | 2.531322  | -0.692612 | -0.649317 | C  | -1.852867 | -2.822491 | 1.490591  |
| H | 2.278737  | 1.038014  | -0.356263 | H  | -2.473358 | -3.607066 | 1.914040  |
| C | -1.022706 | 1.246795  | -0.332850 | H  | -1.170782 | -2.453367 | 2.256819  |
| H | -1.727882 | 1.113031  | -1.146785 | H  | -2.497473 | -2.009780 | 1.155648  |
| H | -1.547959 | 1.309352  | 0.619957  | Br | 0.511341  | 0.161647  | -2.853960 |
| H | -0.468531 | 2.169835  | -0.495399 |    |           |           |           |

**TS(12a\*→13a\*)** [THF]

$E = -3377.02315425221$  au  
 S35

ZPE = 0.18344727 au

$G_{\text{corr}} = 0.14358648$  au

$\nu = -516.21 \text{ cm}^{-1}$

|   |           |           |           |    |           |           |           |
|---|-----------|-----------|-----------|----|-----------|-----------|-----------|
| P | -0.095131 | 0.042187  | 0.427541  | C  | 0.602405  | -3.161510 | 0.193621  |
| O | -0.016477 | 0.019686  | 1.962241  | H  | 0.725831  | -4.149655 | 0.609107  |
| C | 1.861657  | 0.009631  | 1.770410  | H  | 1.431075  | -2.731574 | -0.346554 |
| C | 1.695273  | 0.129654  | 0.269755  | C  | -0.565467 | -2.544180 | 0.299394  |
| H | 2.036824  | 0.887544  | 2.369265  | O  | -0.787556 | -1.270592 | -0.199168 |
| H | 2.020557  | -0.955139 | 2.224450  | O  | -1.660085 | -3.111528 | 0.791820  |
| H | 2.172331  | -0.661564 | -0.299608 | C  | -2.442189 | -2.381641 | 1.737637  |
| H | 2.031118  | 1.091341  | -0.113289 | H  | -3.207893 | -3.068818 | 2.085369  |
| C | -1.028917 | 1.350059  | -0.330767 | H  | -1.839464 | -2.059309 | 2.587499  |
| H | -0.952622 | 1.285793  | -1.415515 | H  | -2.930142 | -1.517229 | 1.285551  |
| H | -2.076311 | 1.280778  | -0.038474 | Br | 4.535157  | 0.008963  | 1.579095  |
| H | -0.628515 | 2.306481  | 0.001255  |    |           |           |           |

13a\* [THF]

$E = -3377.0789298851$  au

ZPE = 0.18512369 au

$G_{\text{corr}} = 0.14387779$  au

|   |           |           |           |    |           |           |           |
|---|-----------|-----------|-----------|----|-----------|-----------|-----------|
| P | -0.166050 | 0.122308  | 0.728968  | C  | 0.738755  | -3.089068 | 0.454083  |
| O | -0.463824 | 0.179582  | 2.185870  | H  | 0.880053  | -4.075824 | 0.867484  |
| C | 2.463837  | -0.203398 | 1.539474  | H  | 1.571957  | -2.623700 | -0.049398 |
| C | 1.620055  | 0.261018  | 0.369552  | C  | -0.454671 | -2.503507 | 0.506941  |
| H | 2.288326  | 0.402836  | 2.424763  | O  | -0.695451 | -1.257587 | 0.003213  |
| H | 2.297221  | -1.248820 | 1.790111  | O  | -1.535438 | -3.138602 | 0.958419  |
| H | 1.850625  | -0.279724 | -0.549902 | C  | -2.584080 | -2.399847 | 1.578680  |
| H | 1.808459  | 1.318784  | 0.168354  | H  | -3.293447 | -3.141369 | 1.935795  |
| C | -0.996226 | 1.323555  | -0.313010 | H  | -2.222878 | -1.815832 | 2.425022  |
| H | -0.712897 | 1.206143  | -1.358117 | H  | -3.093422 | -1.740400 | 0.875305  |
| H | -2.076122 | 1.213049  | -0.221433 | Br | 4.376290  | -0.034595 | 1.114555  |
| H | -0.719614 | 2.324376  | 0.015906  |    |           |           |           |

## REFERENCES

- 1 F. Neese, *WIREs Comput. Mol. Sci.*, 2012, **2**, 73.
- 2 S. Grimme, J. G. Brandenburg, C. Bannwarth and A. Hansen, *J. Chem. Phys.*, 2015, **143**, 054107.
- 3 a) S. Grimme, J. Antony, S. Ehrlich and H. Krieg, *J. Chem. Phys.*, 2010, **132**, 154104. b) S. Grimme, S. Ehrlich and L. Goerigk, *J. Comput. Chem.*, 2011, **32**, 1456.
- 4 a) L. Goerigk and S. Grimme, *J. Chem. Theory Comput.*, 2011, **7**, 291. b) L. Goerigk and S. Grimme, *Phys. Chem. Chem. Phys.*, **13**, 2011, 6670.
- 5 a) F. Weigend, F. Furche and R. Ahlrichs *J. Chem. Phys.*, 2003, **119**, 12753.
- 6 a) A. Schäfer, C. Huber and R. Ahlrichs, *J. Chem. Phys.*, 1994, **100**, 5829. b) F. Weigend and R. Ahlrichs, *Phys. Chem. Chem. Phys.* 2005, **7**, 3297.
- 7 a) A. D. Becke, *J. Chem. Phys.* 1993, **98**, 5648. b) C. Lee, W. Yang and R. G. Parr, *Phys. Rev. B*, 1988, **37**, 785.
- 8 T. Lu, and F. Chen, *J. Comput. Chem.*, 2012, **33**, 580. Website: <http://sobereva.com/multiwfn/>.
- 9 a) V. Barone and M. Cossi, *J. Phys. Chem. A*, 1998, **102**, 1995. b) M. Cossi, N. Rega, G. Scalmani and V. Barone, *J. Comp. Chem.*, 2003, **24**, 669.
- 10 G. Schreckenbach and T. Ziegler, *J. Phys. Chem.*, 1995, **99**, 606–611.
- 11 a) J. P. Perdew, K. Burke and M. Ernzerhof, *Phys. Rev. Lett.*, 1996, **77**, 3865–3868; b) J. P. Perdew, K. Burke and M. Ernzerhof, *Phys. Rev. Lett.*, 1997, **78**, 1396.
- 12 A. Gese, S. Kermanshahian, G. Schnakenburg, Z. Kelemen, L. Nyulaszi, A. E. Ferao and R. K. Streubel, *Inorg. Chem.*, 2021, **60**, 13029–13040.
- 13 D. Biskup, G. Schnakenburg, R. T. Boéré, A. Espinosa Ferao and R. Streubel, *Dalton Trans.*, **2023**, 52, 13781-13786.
- 14 D. Biskup, G. Schnakenburg, R. T. Boéré, A. Espinosa Ferao and R. K. Streubel, *Nat. Commun.*, **2023**, **14**, 6456.
